# Supplementary material for: Identifying and monitoring of forage fish spawning beaches in British Columbia’s Salish Sea for conservation of forage fish
Source: Atypon-hosted journal article supplement (doi:10.1139/facets-2020-0038), 2021-01-01
Supplement: facets-2020-0038_supplement2.pdf [file facets-2020-0038_supplement2.pdf]

 


## Create a new account

Email

Returning user

Can't sign in? Forgot your password?

Enter your email address below and we will send you the reset instructions

**Email\***

Cancel

If the address matches an existing account you will receive an email with instructions to reset your password

Close

## Request Username

Can't sign in? Forgot your username?

Enter your email address below and we will send you your username

**Email\***

Close

If the address matches an existing account you will receive an email with instructions to retrieve your username

## Change Password

Old Password

New Password


Too Short
Weak
Medium
Strong
Very Strong
Too Long

#### Your password must have 8 characters or more and contain 3 of the following:

- a lower case character,
- an upper case character,
- a special character
- or a digit

Too Short

## Password Changed Successfully

Your password has been changed

close

##### LOGIN TO YOUR ACCOUNT

INDIVIDUAL LOGIN | REGISTER
or


INSTITUTIONAL LOGIN

- Login
- Register

**Email\***

**Password\***

Forgot password?
Reset it here

Keep me logged in

All fields with \* are mandatory

**Email\***

All fields with \* are mandatory

Already have an account? Login here

## Verify Phone

Enter the verification code

Cancel

## Congrats!

Your Phone has been verified

close

CLOSE

- This journal
- Citation

SearchSearch

SearchSearch

Advanced searchCitation search

Suggested Terms:

- librarians
- sample issues
- publication fees
- latest issues
- blog

Skip main navigation

- FOR AUTHORS
- FOR REVIEWERS
- FOR LIBRARIANS
- BLOG

Cart
0

Register
Login

- About
  - Vision & Scope
  - Editorial Board
  - Our Partners
  - Article Processing Charges
  - Open Access Info
  - Our Brand
  - FAQs
  - Contact Us
- RECENT ARTICLES
- SUBJECTS
- BROWSE CONTENT
  - Subject Areas
  - List of Issues
  - Featured Articles
  - Collections
- Policies
  - Publishing Policy
  - Privacy Policy
  - Accessibility & Client Services
  - Advertising & Sponsorship

# Cookie Absent


ISSN 2371-1671

###### OUR POLICIES

- Publishing
- Privacy
- Accessibility & Client Service
- Advertising & Sponsorship

###### CONNECT WITH US

- Contact Us
- Blog
- Newsletter Sign Up

FACETS is published byCanadian Science Publishing
