# Supplementary material for: Identifying and monitoring of forage fish spawning beaches in British Columbia’s Salish Sea for conservation of forage fish
Source: Atypon-hosted journal article supplement (doi:10.1139/facets-2020-0038), 2021-01-01
Supplement: facets-2020-0038_supplement3.pdf [file facets-2020-0038_supplement3.pdf]

Table 2. Bowser and Qualicum Bay sampling site locations and sampling occurrences.

| Beach       | Station # | 2017 | 2018 |     |     |     |     |     |     |     |     |     |     |      |
|-------------|-----------|------|------|-----|-----|-----|-----|-----|-----|-----|-----|-----|-----|------|
|             |           | Dec  | Jan  | Feb | Mar | Apr | May | Jun | Jul | Aug | Sep | Oct | Nov | Dec  |
| Bowser Road | 1         | X    |      |     |     |     | X   | X   |     |     |     | X   | X   |      |
| Nile Creek  | 1         |      |      |     |     |     |     | X   |     |     |     |     |     |      |
| Sunny Beach | 1         | X    |      |     |     |     | X   | X   | X   |     |     |     | X   | X    |
| Sunny Beach | 2         |      |      |     |     |     | X   | X   |     |     |     | X   |     |      |
| Mapleguard  | 1         |      |      |     |     |     |     |     |     |     |     |     |     |      |
|             |           |      |      |     |     |     |     |     |     |     |     |     |     |      |
|             |           | 2019 |      |     |     |     |     |     |     |     |     |     |     | 2020 |
|             |           | Jan  | Feb  | Mar | Apr | May | Jun | Jul | Aug | Sep | Oct | Nov | Dec | Jan  |
| Bowser Road | 1         | X    |      | X   |     |     |     |     |     |     |     |     |     |      |
| Nile Creek  | 1         |      |      |     |     |     |     |     | X   |     |     |     |     |      |
| Sunny Beach | 1         | X    |      |     |     |     |     |     |     |     | X   | X   | X   | X    |
| Sunny Beach | 2         |      |      |     |     | X   |     |     |     |     |     |     |     |      |
| Mapleguard  | 1         |      |      |     |     |     |     |     |     |     | X   |     |     |      |

Table 3. Cowichan Bay sampling site locations and sampling occurrences.

| Beach              | Station # | 2017 | 2018 |     |     |     |     |     |     |     |     |     |     |      |
|--------------------|-----------|------|------|-----|-----|-----|-----|-----|-----|-----|-----|-----|-----|------|
|                    |           | Dec  | Jan  | Feb | Mar | Apr | May | Jun | Jul | Aug | Sep | Oct | Nov | Dec  |
| Bomford            | 1         |      |      |     |     |     |     |     |     |     |     |     |     |      |
| Cherry Nature Park | 1         |      |      |     |     |     |     |     |     |     |     |     |     |      |
| Clearwater         | 1         |      |      |     |     |     |     |     |     |     |     |     |     |      |
| Kingscote          | 2         |      |      |     |     |     |     |     |     |     |     |     |     |      |
|                    |           |      |      |     |     |     |     |     |     |     |     |     |     |      |
|                    |           | 2019 |      |     |     |     |     |     |     |     |     |     |     | 2020 |
|                    |           | Jan  | Feb  | Mar | Apr | May | Jun | Jul | Aug | Sep | Oct | Nov | Dec | Jan  |
| Bomford            | 1         |      |      |     |     | X   |     | X   | X   | X   | X   | X   | X   | X    |
| Cherry Nature Park | 1         |      |      |     |     | X   |     |     |     | X   |     | X   | X   | X    |
| Clearwater         | 1         |      |      |     |     | X   | X   | X   | X   | X   | X   | X   | X   | X    |
| Kingscote          | 2         |      |      |     |     | X   | X   | X   |     |     |     | X   | X   | X    |

Table 4. Gabriola Island sampling site locations and sampling occurrences.

| Beach          | Station # | 2017 | 2018 |     |     |     |     |     |     |     |     |     |     |      |
|----------------|-----------|------|------|-----|-----|-----|-----|-----|-----|-----|-----|-----|-----|------|
|                |           | Dec  | Jan  | Feb | Mar | Apr | May | Jun | Jul | Aug | Sep | Oct | Nov | Dec  |
| Bell's Landing | 1         |      |      |     |     |     | X   |     |     |     |     | X   | X   | X    |
| Brickyard      | 1         |      |      |     |     |     | X   |     |     |     |     |     |     |      |
| Degnan         | 1         |      |      |     |     |     | X   |     |     |     |     |     | X   |      |
| Drumbeg        | 1         |      |      |     |     |     | X   |     |     |     | X   |     | X   |      |
| El Verano      | 1         |      |      |     |     |     | X   |     |     |     | X   | X   | X   | X    |
| Long Bay       | 1         |      |      |     |     |     | X   |     |     |     |     | X   | X   |      |
| Pilot Bay      | 1         |      |      |     |     |     | X   |     |     |     |     |     |     |      |
| Ru Bay         | 1         |      |      |     |     |     |     |     |     |     |     |     |     |      |
| Sandwell       | 1         |      |      |     |     |     | X   |     |     |     |     | X   | X   | X    |
| Spring         | 1         |      |      |     |     |     | X   |     |     |     |     |     |     |      |
| Taylor Bay     | 1         |      |      |     |     |     |     |     |     |     |     |     |     |      |
| Whalebone      | 1         |      |      |     |     |     |     |     |     |     | X   | X   |     | X    |
|                |           |      |      |     |     |     |     |     |     |     |     |     |     |      |
|                |           | 2019 |      |     |     |     |     |     |     |     |     |     |     | 2020 |
|                |           | Jan  | Feb  | Mar | Apr | May | Jun | Jul | Aug | Sep | Oct | Nov | Dec | Jan  |
| Bell's Landing | 1         | X    | X    |     |     |     |     |     |     | X   | X   | X   | X   |      |
| Brickyard      | 1         |      |      |     |     |     |     |     |     |     |     |     |     |      |
| Degnan         | 1         | X    | X    | X   |     |     |     |     |     |     |     |     |     |      |
| Drumbeg        | 1         | X    | X    | X   |     |     | X   | X   |     | X   | X   | X   | X   |      |
| El Verano      | 1         | X    | X    |     |     |     |     |     |     | X   | X   | X   | X   | X    |
| Long Bay       | 1         | X    | X    |     |     |     |     |     |     |     | X   | X   | X   | X    |
| Pilot Bay      | 1         | X    |      |     |     |     |     |     |     |     | X   | X   | X   |      |
| Ru Bay         | 1         | X    | X    |     |     |     |     |     |     | X   | X   | X   | X   | X    |
| Sandwell       | 1         | X    | X    | X   |     |     |     |     | X   | X   | X   | X   | X   | X    |
| Spring         | 1         |      |      |     |     |     |     |     |     |     |     |     |     |      |
| Taylor Bay     | 1         | X    |      |     |     |     |     |     |     |     |     |     |     |      |
| Whalebone      | 1         | X    | X    |     |     |     |     |     |     | X   |     | X   | X   | X    |

Table 5. Ladysmith sampling site locations and sampling occurrences.

| Beach               | Station # | 2017 | 2018 |     |     |     |     |     |     |     |     |     |     |      |
|---------------------|-----------|------|------|-----|-----|-----|-----|-----|-----|-----|-----|-----|-----|------|
|                     |           | Dec  | Jan  | Feb | Mar | Apr | May | Jun | Jul | Aug | Sep | Oct | Nov | Dec  |
| Elliot Beach Park   | 1         |      |      |     |     |     |     | X   | X   | X   |     | X   | X   |      |
| Transfer Beach Park | 1         |      |      |     |     |     |     | X   | X   | X   |     | X   |     |      |
|                     |           |      |      |     |     |     |     |     |     |     |     |     |     |      |
|                     |           | 2019 |      |     |     |     |     |     |     |     |     |     |     | 2020 |
|                     |           | Jan  | Feb  | Mar | Apr | May | Jun | Jul | Aug | Sep | Oct | Nov | Dec | Jan  |
| Elliot Beach Park   | 1         | X    |      |     |     |     |     |     |     |     |     |     |     |      |
| Transfer Beach Park | 1         | X    | X    | X   |     | X   |     | X   | X   | X   | X   | X   |     |      |

Table 6. Lantzville sampling site locations and sampling occurrences.

| Beach     | Station # | 2017 | 2018 |     |     |     |     |     |     |     |     |     |     |      |
|-----------|-----------|------|------|-----|-----|-----|-----|-----|-----|-----|-----|-----|-----|------|
|           |           | Dec  | Jan  | Feb | Mar | Apr | May | Jun | Jul | Aug | Sep | Oct | Nov | Dec  |
| Sebastian | 1         |      |      |     |     |     |     |     |     | X   |     | X   | X   | X    |
|           |           |      |      |     |     |     |     |     |     |     |     |     |     |      |
|           |           | 2019 |      |     |     |     |     |     |     |     |     |     |     | 2020 |
|           |           | Jan  | Feb  | Mar | Apr | May | Jun | Jul | Aug | Sep | Oct | Nov | Dec | Jan  |
| Sebastian | 1         | X    | X    | X   |     | X   |     |     | X   | X   | X   | X   | X   | X    |

Table 7. Maple Bay sampling site locations and sampling occurrences.

| Beach     | Station # | 2017 | 2018 |     |     |     |     |     |     |     |     |     |     |      |
|-----------|-----------|------|------|-----|-----|-----|-----|-----|-----|-----|-----|-----|-----|------|
|           |           | Dec  | Jan  | Feb | Mar | Apr | May | Jun | Jul | Aug | Sep | Oct | Nov | Dec  |
| Maple Bay | 1         |      |      |     |     |     |     |     |     |     |     |     | X   | X    |
|           |           |      |      |     |     |     |     |     |     |     |     |     |     |      |
|           |           | 2019 |      |     |     |     |     |     |     |     |     |     |     | 2020 |
|           |           | Jan  | Feb  | Mar | Apr | May | Jun | Jul | Aug | Sep | Oct | Nov | Dec | Jan  |
| Maple Bay | 1         | X    | X    | X   |     | X   | X   | X   | X   | X   | X   | X   | X   | X    |

Table 8. Nanaimo sampling site locations and sampling occurrences.

[illegible]

Table 9. Nanoose sampling site locations and sampling occurrences.

[illegible]

Table 10. Parksville sampling site locations and sampling occurrences.

[illegible]

Table 11. Qualicum Beach sampling site locations and sampling occurrences.

| Beach                   | Station # | 2017 | 2018 |     |     |     |     |     |     |     |     |     |     |     |      |
|-------------------------|-----------|------|------|-----|-----|-----|-----|-----|-----|-----|-----|-----|-----|-----|------|
|                         |           | Dec  | Jan  | Feb | Mar | Apr | May | Jun | Jul | Aug | Sep | Oct | Nov | Dec |      |
| Judges Row              | 1         |      |      |     |     |     |     |     |     |     |     |     |     |     |      |
| Judges Row              | 2         |      |      |     |     |     |     |     |     |     |     |     |     |     |      |
| Little Qualicum         | 1         |      |      |     |     |     | X   |     |     |     |     |     |     |     |      |
| Little Qualicum         | 2         |      |      | X   |     |     | X   | X   |     |     |     |     | X   |     |      |
| Little Qualicum         | 3         |      |      | X   |     |     |     | X   |     |     |     | X   | X   | X   |      |
| Little Qualicum Estuary | 1         | X    |      |     |     |     |     | X   |     |     |     |     |     |     |      |
| Milner Gardens          | 1         |      |      | X   |     |     |     |     |     |     |     |     | X   |     |      |
| Milner Gardens          | 2         |      |      |     |     |     |     |     | X   | X   |     |     |     |     |      |
| Qualicum                | 1         |      |      | X   | X   |     | X   |     | X   | X   |     |     |     |     |      |
| Qualicum                | 2         |      |      |     |     |     | X   |     |     |     |     |     |     |     |      |
| Qualicum                | 3         |      |      |     |     |     | X   |     |     |     |     |     |     |     |      |
|                         |           |      |      |     |     |     |     |     |     |     |     |     |     |     |      |
|                         |           | 2019 |      |     |     |     |     |     |     |     |     |     |     |     | 2020 |
|                         |           | Jan  | Feb  | Mar | Apr | May | Jun | Jul | Aug | Sep | Oct | Nov | Dec | Jan |      |
| Judges Row              | 1         |      |      |     |     |     | X   |     |     | X   |     |     | X   | X   |      |
| Judges Row              | 2         |      |      |     |     |     | X   |     |     | X   |     | X   | X   | X   |      |
| Little Qualicum         | 1         |      |      |     |     |     |     |     | X   | X   | X   | X   | X   | X   |      |
| Little Qualicum         | 2         |      |      | X   |     | X   |     |     | X   | X   | X   | X   | X   | X   |      |
| Little Qualicum         | 3         | X    |      | X   |     | X   |     | X   | X   | X   | X   | X   | X   | X   |      |
| Little Qualicum Estuary | 1         |      |      |     |     |     |     | X   |     | X   | X   | X   | X   | X   |      |
| Milner Gardens          | 1         | X    |      | X   |     | X   |     |     | X   | X   | X   | X   | X   | X   |      |
| Milner Gardens          | 2         |      |      |     |     |     |     |     | X   |     |     |     |     |     |      |
| Qualicum                | 1         |      |      |     |     |     |     |     |     |     |     |     |     |     |      |
| Qualicum                | 2         |      |      |     |     |     |     |     | X   |     |     |     |     |     |      |
| Qualicum                | 3         |      |      |     |     |     |     |     |     |     | X   |     |     |     |      |

Table 12. Thetis Island sampling site locations and sampling occurrences.

[illegible]
