# Supplementary material for: Identifying and monitoring of forage fish spawning beaches in British Columbia’s Salish Sea for conservation of forage fish
Source: Atypon-hosted journal article supplement (doi:10.1139/facets-2020-0038), 2021-01-01
Supplement: facets-2020-0038_supplement4.pdf [file facets-2020-0038_supplement4.pdf]

# Forage Fish Spawning Beach Survey

## Location Code (Refer to document)

| Region | Municipality | Beach | DFO Mngt Area |
|--------|--------------|-------|---------------|
|        |              |       |               |

## Last High Tide

|              |
|--------------|
| Time (24hr): |
| Elevation:   |

## 2<sup>nd</sup> Effective High Tide

|              |
|--------------|
| Time (24hr): |
| Elevation:   |

## Samplers

|                 |  |
|-----------------|--|
| Name(s)         |  |
| Organization    |  |
| Date (mm/dd/yy) |  |
| Time (24hr)     |  |
| Camera ID       |  |

## Current Conditions

|                    |  |
|--------------------|--|
| Air Temp (°C)      |  |
| Wind Direction     |  |
| Wind Speed (km/hr) |  |
| Water Temp (°C)    |  |

## Sediment Sample Collection

| Sample Station # | Sample # | Time (24hr) | UTM (m) | Beach | Backshore | Width (m) | Length (< or > 100m) | Landmark Object* | Landmark Distance (m) | Shading | Sample Type | Photo # |
|------------------|----------|-------------|---------|-------|-----------|-----------|----------------------|------------------|-----------------------|---------|-------------|---------|
|                  |          |             |         |       |           |           |                      |                  |                       |         |             |         |
|                  |          |             |         |       |           |           |                      |                  |                       |         |             |         |
|                  |          |             |         |       |           |           |                      |                  |                       |         |             |         |

## Comments

*(Examples: What does the property surrounding the sample site look like? Is there anything around the site that could negatively impact the survival of forage fish embryos? Have there been any recent storm events or human actions that could have impacted forage fish embryo survival or dispersal?)*

## Field Observation Sampling Codes

**Last High Tide** refers to the most recent high tide that occurred. Use <http://waterlevels.gc.ca> for tide charts.

**2<sup>nd</sup> Effective High Tide** refers to the high tide that occurred prior to the last one, if it was greater in size than the most recent one. There will not always be a 2<sup>nd</sup> effective high tide.

**Current Conditions** (air temp, wind direction, & wind speed) can be obtained using the *Weather Underground* app, which can be downloaded onto your mobile phone (<https://www.wunderground.com/weather-app>).

**Water Temperature** will be measured with your thermometer in the sample kit. Leave the thermometer in non-stagnant water for 60 seconds and then record the value.

**Beach:** Dominant sediment character of the beach

- 0 = silt and mud (<0.0625 mm, feels “slimy”)
- 1 = pure sand (0.0625 mm – 2.0 mm, feels “gritty”)
- 2 = pea gravel (2.0 mm – 4.0 mm, “fine gravel”) with sand base
- 3 = pebble gravel (4.0 mm – 64.0 mm) with sand base
- 4 = cobble gravel (64.0 mm – 256.0 mm) with sand base
- 5 = boulder gravel (256.0 mm – 4096.0 mm) with sand base
- 6 = boulders (>4096.0 mm) with sand base
- 7 = gravel to boulders without sand base
- 8 = bedrock, no habitat

**Backshore:** Integrity of uplands (up to 30m of high water mark)

- |                          |                   |
|--------------------------|-------------------|
| 1 = natural, 0% impacted | 4 = 75% impacted  |
| 2 = 25% impacted         | 5 = 100% impacted |
| 3 = 50% impacted         |                   |

**Width** of the potential spawning substrate band to the nearest metre. Judged by character of substrate and presence of spawn, when possible.

**Length** of the beach. Using your best judgement, determine if the length of the beach with similar substrate is less than (<) or greater than (>) 100m.

**Landmark Object:** Note a landmark object in the uplands area that is parallel to the sample zone transect. This will be the object from which you measure the “Sample Zone” distance from. Ensure that the object chosen is a permanent structure.

**Landmark Distance:** Distance of sample zone transect to the landmark, in metres to the nearest 0.5 metre. This will be used in order to repeat a sampling event in the exact same location.

**Shading:** Amount of spawning substrate zone that is shaded, averaging over the entire length of the beach station. Consider the best interpretation for the entire day and season.

- |                   |                 |
|-------------------|-----------------|
| 1 = fully exposed | 4 = 75% shaded  |
| 2 = 25% shaded    | 5 = 100% shaded |
| 3 = 50% shaded    |                 |

**Sample Type:** S = Scoop or B = Bulk

If eggs are visible to the naked eye it is only necessary to take a single 500mL scoop of sediment to be processed. In all other cases a bulk sample is to be collected.

**Photos:** Take 6 photos standing at the centre of the sample transect.

**\*Photo 1:** Completed sample tag

**\*Photo 2:** Sediment w/scale at transect

**Photo 3:** Beach backshore

**Photo 4:** Beach right

**Photo 5:** Beach foreshore (towards water)

**Photo 6:** Beach left

*\*If multiple samples are collected at a single station, only photos 1 & 2 should be repeated for each sample.*

**\*\*\*I certify that to the best of my abilities, the surveys recorded on this data sheet and the associated samples were collected and documented to the methodology instructed to me and the information I am providing are the true and accurate results of these surveys.**

**Lead Signature:**

---
