# Supplementary material for: Identifying and monitoring of forage fish spawning beaches in British Columbia’s Salish Sea for conservation of forage fish
Source: Atypon-hosted journal article supplement (doi:10.1139/facets-2020-0038), 2021-01-01
Supplement: facets-2020-0038_supplement6.pdf [file facets-2020-0038_supplement6.pdf]

## Forage Fish Spawning Habitat Beach Survey

### Samplers

|                 |                                 |
|-----------------|---------------------------------|
| Name(s)         | Ashley Van Acken & Haley Tomlin |
| Organization    | MABRRI                          |
| Date (mm/dd/yy) | 12/08/17                        |
| Time (24hr)     | 13:45                           |
| Camera ID       | Haley's iPhone                  |

Access Database ID:

| Region | Municipality | Beach | DFO Mngt Area |
|--------|--------------|-------|---------------|
| RDN    | SH           | SB    | 14-4          |

### Last High Tide (12/08/17)

|                    |
|--------------------|
| Time (24hr): 09:59 |
| Elevation: 5.2m    |

### 2nd Effective High Tide

|                 |
|-----------------|
| Time (24hr): -- |
| Elevation: --   |

### Calculating Tidal Elevation

| Station | Elevation Change | Subtract Eye Height | Elevation Difference | Time  | Elevation Relative to Chart Datum | Tidal Elevation (Chart Datum) |
|---------|------------------|---------------------|----------------------|-------|-----------------------------------|-------------------------------|
| 1       | A 2.6m           | -1.58m              | 1.02m                | 14:28 | 3.6m                              | 4.62m                         |
|         | B                |                     |                      |       |                                   |                               |
|         | C                |                     |                      |       |                                   |                               |
|         | D                |                     |                      |       |                                   |                               |
|         | Total            |                     | 1.02m                |       |                                   |                               |

### Current Conditions

|                    |                           |
|--------------------|---------------------------|
| Weather Conditions | Overcast; calm-light wind |
| Air Temp (°C)      | 3°C                       |
| Wind Direction     | N/A                       |
| Wind Speed (km/hr) | N/A                       |
| Water Temp (°C)    | 8°C                       |

### Episodic Events (determined prior to or after sampling)

Has there been a storm event in the last week? Yes ☐ No ☒

|                    |                               |
|--------------------|-------------------------------|
| Date of Storm      |                               |
| Maximum Wind Speed | Precipitation from Event (mm) |
| Storm Category     |                               |

Evidence of beach wrack harvesting? Yes ☐ No ☒

### Site Attributes

|                      |                                                                                                                                                                                                                          |              |
|----------------------|--------------------------------------------------------------------------------------------------------------------------------------------------------------------------------------------------------------------------|--------------|
| Aspect               | Direction: NE                                                                                                                                                                                                            | Bearing: 40° |
| Beach Slope          | Flat (<5°) <input type="radio"/> Inclined (5°-20°) <input checked="" type="radio"/> Steep (>20°) <input type="radio"/> Slope of Beach (°): --                                                                            |              |
| Max. Fetch Distance* | 102 km (ESE)                                                                                                                                                                                                             |              |
| Exposure**           | Very Protected <input type="radio"/> Protected <input type="radio"/> Semi-Protected <input type="radio"/> Semi-Exposed <input checked="" type="radio"/> Exposed <input type="radio"/> Very-Exposed <input type="radio"/> |              |

\* Determined from chart measurements  
\*\* Determined based on Maximum Fetch Distance

### Sediment Sample Collection

| Sample Station # | Time (24hr) | UTM (m) (10U)           | Beach | Backshore | Width (m) | Length (m) | Sample # | Landmark Object | Landmark Distance (m) | Tidal Elevation | Shading | Sample Type | Surf Smelt | Sand Lance | Photo # |
|------------------|-------------|-------------------------|-------|-----------|-----------|------------|----------|-----------------|-----------------------|-----------------|---------|-------------|------------|------------|---------|
| 1                | 14:02       | 381477 mE<br>5474068 mN | 3     | 5         | 6.8       | 170        | 1        | Chained log     | 14.8                  | 4.62m           | 1       | B           | 0          | 0          | 1-6     |

### Comments

### Forage Fish Spawn Sample Lab Analysis

| Sample Station # | Sample # | Species | # of Eggs | Alive:Dead | Comments |
|------------------|----------|---------|-----------|------------|----------|
| 1                | 1        | PSL     | 2         | --         |          |

Processed by: Ashley Van Acken

Analyzed by: Haley Tomlin

Version: October 2019

## Forage Fish Spawning Habitat Beach Survey

### Samplers

|                 |                    |
|-----------------|--------------------|
| Name(s)         | Ashley/Haley/Brian |
| Organization    | MABRRI             |
| Date (mm/dd/yy) | 02/01/18           |
| Time (24hr)     | 12:12              |
| Camera ID       | Fuji #2            |

Access Database ID:

| Region | Municipality | Beach | DFO Mngt Area |
|--------|--------------|-------|---------------|
| RDN    | PK           | CPB   | 14-1          |

### Last High Tide (02/01/18)

|                    |
|--------------------|
| Time (24hr): 06:49 |
| Elevation: 5.1m    |

### 2nd Effective High Tide

|                 |
|-----------------|
| Time (24hr): -- |
| Elevation: --   |

### Calculating Tidal Elevation

| Station | Elevation Change | Subtract Eye Height | Elevation Difference | Time  | Elevation Relative to Chart Datum | Tidal Elevation (Chart Datum) |
|---------|------------------|---------------------|----------------------|-------|-----------------------------------|-------------------------------|
| 1       | A 2.4m           | -1.0m               | 1.4m                 | 12:07 | 3.1m                              | 5.14m                         |
|         | B 1.4m           | -1.0m               | 0.4m                 |       |                                   |                               |
|         | C 1.24m          | -1.0m               | 0.24m                |       |                                   |                               |
|         | D                |                     |                      |       |                                   |                               |
|         | Total            |                     | 2.04m                |       |                                   |                               |

### Current Conditions

|                    |                           |
|--------------------|---------------------------|
| Weather Conditions | Overcast, light rain&wind |
| Air Temp (°C)      | 6°C                       |
| Wind Direction     | WNW                       |
| Wind Speed (km/hr) | w km/hr                   |
| Water Temp (°C)    | 8°C                       |

### Episodic Events (determined prior to or after sampling)

Has there been a storm event in the last week? Yes ☐ No ☒

|                    |                               |
|--------------------|-------------------------------|
| Date of Storm      |                               |
| Maximum Wind Speed | Precipitation from Event (mm) |
| Storm Category     |                               |

Evidence of beach wrack harvesting? Yes ☐ No ☒

### Site Attributes

|                      |                                                                                                                                                                                                                          |               |
|----------------------|--------------------------------------------------------------------------------------------------------------------------------------------------------------------------------------------------------------------------|---------------|
| Aspect               | Direction: NNW                                                                                                                                                                                                           | Bearing: 350° |
| Beach Slope          | Flat (<5°) <input type="radio"/> Inclined (5°-20°) <input checked="" type="radio"/> Steep (>20°) <input type="radio"/> Slope of Beach (°): 8.5°                                                                          |               |
| Max. Fetch Distance* | 18km (NW)                                                                                                                                                                                                                |               |
| Exposure**           | Very Protected <input type="radio"/> Protected <input type="radio"/> Semi-Protected <input checked="" type="radio"/> Semi-Exposed <input type="radio"/> Exposed <input type="radio"/> Very-Exposed <input type="radio"/> |               |

\* Determined from chart measurements  
\*\* Determined based on Maximum Fetch Distance

### Sediment Sample Collection

| Sample Station # | Time (24hr) | UTM (m) (10U)           | Beach | Backshore | Width (m) | Length (m) | Sample # | Landmark Object | Landmark Distance (m) | Tidal Elevation | Shading | Sample Type | Surf Smelt | Sand Lance | Photo # |
|------------------|-------------|-------------------------|-------|-----------|-----------|------------|----------|-----------------|-----------------------|-----------------|---------|-------------|------------|------------|---------|
| 1                | 12:12       | 404870 mE<br>5464492 mN | 2     | 5         | 5         | 97         | 1        | Shellfish sign  | 14.6                  | 5.14            | 1       | B           | 0          | 0          | 1-6     |

Comments There was a recent king tide – therefore, higher tide line.

### Forage Fish Spawn Sample Lab Analysis

| Sample Station # | Sample # | Species | # of Eggs | Alive:Dead | Comments |
|------------------|----------|---------|-----------|------------|----------|
| 1                | 1        | PSL     | 6         | --         |          |

Processed by: Haley Tomlin (Feb 1, 2018)

Analyzed by: Brian Timmer (Feb 2, 2018)

Version: October 2019

## Forage Fish Spawning Habitat Beach Survey

### Samplers

|                 |                    |
|-----------------|--------------------|
| Name(s)         | Ashley/Haley/Brian |
| Organization    | MABRRI             |
| Date (mm/dd/yy) | 02/01/18           |
| Time (24hr)     | 12:52              |
| Camera ID       | Fuji #2            |

Access Database ID:

| Region | Municipality | Beach | DFO Mngt Area |
|--------|--------------|-------|---------------|
| RDN    | PK           | CPB   | 14-1          |

### Last High Tide (02/01/18)

Time (24hr): 06:49  
Elevation: 5.1m

### 2nd Effective High Tide

Time (24hr): --  
Elevation: --

### Calculating Tidal Elevation

| Station | Elevation Change | Subtract Eye Height | Elevation Difference | Time  | Elevation Relative to Chart Datum | Tidal Elevation (Chart Datum) |
|---------|------------------|---------------------|----------------------|-------|-----------------------------------|-------------------------------|
| 2       | A 2.45m          | -1.0m               | 1.45m                | 13:01 | 3.1m                              | 5.13m                         |
|         | B 1.58m          | -1.0m               | 0.58m                |       |                                   |                               |
|         | C                |                     |                      |       |                                   |                               |
|         | D                |                     |                      |       |                                   |                               |
|         | Total            |                     | 2.03m                |       |                                   |                               |

### Current Conditions

|                    |                           |
|--------------------|---------------------------|
| Weather Conditions | Overcast, light rain&wind |
| Air Temp (°C)      | 6°C                       |
| Wind Direction     | WNW                       |
| Wind Speed (km/hr) | 2 km/hr                   |
| Water Temp (°C)    | 8°C                       |

### Episodic Events (determined prior to or after sampling)

|                                                |     |                               |
|------------------------------------------------|-----|-------------------------------|
| Has there been a storm event in the last week? | Yes | No                            |
| Date of Storm                                  |     |                               |
| Maximum Wind Speed                             |     | Precipitation from Event (mm) |
| Storm Category                                 |     |                               |

Evidence of beach wrack harvesting? Yes No

### Site Attributes

|                      |                |                   |                |                        |               |              |
|----------------------|----------------|-------------------|----------------|------------------------|---------------|--------------|
| Aspect               | Direction: W   |                   |                |                        | Bearing: 280° |              |
| Beach Slope          | Flat (<5°)     | Inclined (5°-20°) | Steep (>20°)   | Slope of Beach (°): 7° |               |              |
| Max. Fetch Distance* | 17km (NW)      |                   |                |                        |               |              |
| Exposure**           | Very Protected | Protected         | Semi-Protected | Semi-Exposed           | Exposed       | Very-Exposed |

\* Determined from chart measurements

\*\* Determined based on Maximum Fetch Distance

### Sediment Sample Collection

| Sample Station # | Time (24hr) | UTM (m) (10U)           | Beach | Backshore | Width (m) | Length (m) | Sample # | Landmark Object | Landmark Distance (m) | Tidal Elevation | Shading | Sample Type | Surf Smelt | Sand Lance | Photo # |
|------------------|-------------|-------------------------|-------|-----------|-----------|------------|----------|-----------------|-----------------------|-----------------|---------|-------------|------------|------------|---------|
| 2                | 13:01       | 404949 mE<br>5464631 mN | 1     | 5         | 5         | 22         | 1        | Fence           | 15.1                  | 5.13            | 1       | B           | 0          | 0          | 1-6     |

Comments Transect laid only 22m because the curved topography and structure of the beach.

### Forage Fish Spawn Sample Lab Analysis

| Sample Station # | Sample # | Species | # of Eggs | Alive:Dead | Comments |
|------------------|----------|---------|-----------|------------|----------|
| 2                | 1        | PSL     | 7         | --         |          |

Processed by: Haley Tomlin (Feb 1, 2018)

Analyzed by: Brian Timmer (Feb 2, 2018)

Version: October 2019

## Forage Fish Spawning Habitat Beach Survey

### Samplers

|                 |                                 |
|-----------------|---------------------------------|
| Name(s)         | Ashley Van Acken & Haley Tomlin |
| Organization    | MABRRI                          |
| Date (mm/dd/yy) | 02/08/18                        |
| Time (24hr)     | 07:17                           |
| Camera ID       | Ashley's iPhone                 |

Access Database ID:

| Region | Municipality | Beach | DFO Mngt Area |
|--------|--------------|-------|---------------|
| RDN    | PK           | MB    | 14-1          |

### Last High Tide (02/08/18)

Time (24hr): 00:45  
Elevation: 3.8m

### 2nd Effective High Tide

Time (24hr): --  
Elevation: --

### Calculating Tidal Elevation

| Station | Elevation Change | Subtract Eye Height | Elevation Difference | Time  | Elevation Relative to Chart Datum | Tidal Elevation (Chart Datum) |
|---------|------------------|---------------------|----------------------|-------|-----------------------------------|-------------------------------|
| 1       | A 2.3m           | -1.0m               | 1.3m                 | 07:17 | 3.5m                              | 5.64m                         |
|         | B 1.1m           | -1.0m               | 0.1m                 |       |                                   |                               |
|         | C 1.34m          | -1.0m               | 0.34m                |       |                                   |                               |
|         | D 1.4m           | -1.0m               | 0.4m                 |       |                                   |                               |
|         | Total            |                     | 2.14m                |       |                                   |                               |

### Current Conditions

|                    |                       |
|--------------------|-----------------------|
| Weather Conditions | Clear sky; light wind |
| Air Temp (°C)      | 9°C                   |
| Wind Direction     | W                     |
| Wind Speed (km/hr) | 4 km/hr               |
| Water Temp (°C)    | 8°C                   |

### Episodic Events (determined prior to or after sampling)

|                                                |     |                               |
|------------------------------------------------|-----|-------------------------------|
| Has there been a storm event in the last week? | Yes | No                            |
| Date of Storm                                  |     |                               |
| Maximum Wind Speed                             |     | Precipitation from Event (mm) |
| Storm Category                                 |     |                               |

Evidence of beach wrack harvesting? Yes No

### Site Attributes

|                      |                |                   |                |                        |             |              |
|----------------------|----------------|-------------------|----------------|------------------------|-------------|--------------|
| Aspect               | Direction: N   |                   |                |                        | Bearing: 1° |              |
| Beach Slope          | Flat (<5°)     | Inclined (5°-20°) | Steep (>20°)   | Slope of Beach (°): 7° |             |              |
| Max. Fetch Distance* | 16 km (N)      |                   |                |                        |             |              |
| Exposure**           | Very Protected | Protected         | Semi-Protected | Semi-Exposed           | Exposed     | Very-Exposed |

\* Determined from chart measurements

\*\* Determined based on Maximum Fetch Distance

### Sediment Sample Collection

| Sample Station # | Time (24hr) | UTM (m) (10U)           | Beach | Backshore | Width (m) | Length (m) | Sample # | Landmark Object | Landmark Distance (m) | Tidal Elevation | Shading | Sample Type | Surf Smelt | Sand Lance | Photo # |
|------------------|-------------|-------------------------|-------|-----------|-----------|------------|----------|-----------------|-----------------------|-----------------|---------|-------------|------------|------------|---------|
| 1                | 07:23       | 404331 mE<br>5464201 mN | 2/3   | 5         | 4.9       | 120        | 1        | Boardwalk       | 23.1                  | 5.64            | 1       | B           | 0          | 0          | 1-6     |
| 1                | 07:39       | 404332 mE<br>5464199 mN | 3     | 5         | 4.9       | 120        | 2        | Boardwalk       | 26.7                  | 5.14            | 1       | B           | 0          | 0          | 7-12    |

### Comments

### Forage Fish Spawn Sample Lab Analysis

| Sample Station # | Sample # | Species | # of Eggs | Alive:Dead | Comments |
|------------------|----------|---------|-----------|------------|----------|
| 1                | 1        | PSL     | 5         | --         |          |
| 1                | 2        | PSL     | 2         | --         |          |

Processed by: Haley Tomlin (Feb 8, 2018)

Analyzed by: Brian Timmer (Feb 9, 2018)

Version: October 2019

## Forage Fish Spawning Habitat Beach Survey

### Samplers

|                 |                                 |
|-----------------|---------------------------------|
| Name(s)         | Ashley Van Acken & Haley Tomlin |
| Organization    | MABRRI                          |
| Date (mm/dd/yy) | 02/08/18                        |
| Time (24hr)     | 07:48                           |
| Camera ID       | Ashley's iPhone                 |

|                     |              |       |               |
|---------------------|--------------|-------|---------------|
| Access Database ID: |              |       |               |
| Region              | Municipality | Beach | DFO Mngt Area |
| RDN                 | PK           | MB    | 14-1          |

### Last High Tide (02/08/18)

|                    |
|--------------------|
| Time (24hr): 00:45 |
| Elevation: 3.8m    |

### 2<sup>nd</sup> Effective High Tide

|                 |
|-----------------|
| Time (24hr): -- |
| Elevation: --   |

### Calculating Tidal Elevation

| Station | Elevation Change | Subtract Eye Height | Elevation Difference | Time  | Elevation Relative to Chart Datum | Tidal Elevation (Chart Datum) |
|---------|------------------|---------------------|----------------------|-------|-----------------------------------|-------------------------------|
| 1       | A                | 1.5m                | -1.0m                | 07:48 | 3.6m                              | 4.1m                          |
|         | B                |                     |                      |       |                                   |                               |
|         | C                |                     |                      |       |                                   |                               |
|         | D                |                     |                      |       |                                   |                               |
|         | Total            |                     | 0.5m                 |       |                                   |                               |

### Current Conditions

|                    |                       |
|--------------------|-----------------------|
| Weather Conditions | Clear sky; light wind |
| Air Temp (°C)      | 9°C                   |
| Wind Direction     | W                     |
| Wind Speed (km/hr) | 4 km/hr               |
| Water Temp (°C)    | 8°C                   |

### Episodic Events (determined prior to or after sampling)

|                                                |     |                               |
|------------------------------------------------|-----|-------------------------------|
| Has there been a storm event in the last week? | Yes | No                            |
| Date of Storm                                  |     |                               |
| Maximum Wind Speed                             |     | Precipitation from Event (mm) |
| Storm Category                                 |     |                               |

Evidence of beach wrack harvesting? Yes No

### Site Attributes

|                      |                |                   |
|----------------------|----------------|-------------------|
| Aspect               | Direction: N   | Bearing: 1°       |
| Beach Slope          | Flat (<5°)     | Inclined (5°-20°) |
| Max. Fetch Distance* | 16 km (N)      | Steep (>20°)      |
| Exposure**           | Very Protected | Protected         |
|                      | Semi-Protected | Semi-Exposed      |
|                      | Exposed        | Very-Exposed      |

\* Determined from chart measurements

\*\* Determined based on Maximum Fetch Distance

### Sediment Sample Collection

| Sample Station # | Time (24hr) | UTM (m) (10U)           | Beach | Backshore | Width (m) | Length (m) | Sample # | Landmark Object | Landmark Distance (m) | Tidal Elevation | Shading | Sample Type | Surf Smelt | Sand Lance | Photo # |
|------------------|-------------|-------------------------|-------|-----------|-----------|------------|----------|-----------------|-----------------------|-----------------|---------|-------------|------------|------------|---------|
| 1                | 07:48       | 404378 mE<br>5464210 mN | 3     | 5         | 5.3       | 30         | 3        | Boardwalk       | 30.7                  | 4.1             | 1       | B           | 0          | 0          | 1-6     |

### Comments

### Forage Fish Spawn Sample Lab Analysis

| Sample Station # | Sample # | Species | # of Eggs | Alive:Dead | Comments |
|------------------|----------|---------|-----------|------------|----------|
| 1                | 3        | PSL     | 6         | --         |          |

Processed by: Haley Tomlin (Feb 8, 2018)

Analyzed by: Brian Timmer (Feb 9, 2018)

Version: October 2019

## Forage Fish Spawning Habitat Beach Survey

### Samplers

|                 |                             |
|-----------------|-----------------------------|
| Name(s)         | Haley Tomlin & Brian Timmer |
| Organization    | MABRRI                      |
| Date (mm/dd/yy) | 02/15/18                    |
| Time (24hr)     | 11:47                       |
| Camera ID       | Fuji #2                     |

|                     |              |       |               |
|---------------------|--------------|-------|---------------|
| Access Database ID: |              |       |               |
| Region              | Municipality | Beach | DFO Mngt Area |
| RDN                 | QB           | MG    | 14-4          |

### Last High Tide (02/15/18)

|                    |
|--------------------|
| Time (24hr): 06:24 |
| Elevation: 4.6m    |

### 2<sup>nd</sup> Effective High Tide

|                 |
|-----------------|
| Time (24hr): -- |
| Elevation: --   |

### Calculating Tidal Elevation

| Station | Elevation Change | Subtract Eye Height | Elevation Difference | Time  | Elevation Relative to Chart Datum | Tidal Elevation (Chart Datum) |
|---------|------------------|---------------------|----------------------|-------|-----------------------------------|-------------------------------|
| 1       | A                | 2.26m               | -1.0m                | 11:43 | 3.2m                              | 4.46m                         |
|         | B                |                     |                      |       |                                   |                               |
|         | C                |                     |                      |       |                                   |                               |
|         | D                |                     |                      |       |                                   |                               |
|         | Total            |                     | 1.26m                |       |                                   |                               |

### Current Conditions

|                    |          |
|--------------------|----------|
| Weather Conditions | Overcast |
| Air Temp (°C)      | 6°C      |
| Wind Direction     | E        |
| Wind Speed (km/hr) | 1 km/hr  |
| Water Temp (°C)    | 8°C      |

### Episodic Events (determined prior to or after sampling)

|                                                |     |                               |
|------------------------------------------------|-----|-------------------------------|
| Has there been a storm event in the last week? | Yes | No                            |
| Date of Storm                                  |     |                               |
| Maximum Wind Speed                             |     | Precipitation from Event (mm) |
| Storm Category                                 |     |                               |

Evidence of beach wrack harvesting? Yes No

### Site Attributes

|                      |                |                   |
|----------------------|----------------|-------------------|
| Aspect               | Direction: N   | Bearing: 13°      |
| Beach Slope          | Flat (<5°)     | Inclined (5°-20°) |
| Max. Fetch Distance* | 71.5km (NW)    | Steep (>20°)      |
| Exposure**           | Very Protected | Protected         |
|                      | Semi-Protected | Semi-Exposed      |
|                      | Exposed        | Very-Exposed      |

\* Determined from chart measurements

\*\* Determined based on Maximum Fetch Distance

### Sediment Sample Collection

| Sample Station # | Time (24hr) | UTM (m) (10U)           | Beach | Backshore | Width (m) | Length (m) | Sample # | Landmark Object | Landmark Distance (m) | Tidal Elevation | Shading | Sample Type | Surf Smelt | Sand Lance | Photo # |
|------------------|-------------|-------------------------|-------|-----------|-----------|------------|----------|-----------------|-----------------------|-----------------|---------|-------------|------------|------------|---------|
| 1                | 11:53       | 397333 mE<br>5468441 mN | 2     | 2         | 6.8       | 112        | 1        | Pilings         | 22                    | 4.46            | 3       | B           | 0          | 0          | 1-6     |
| 1                | 12:08       | 397333 mE<br>5468436 mN | 2     | 2         | 6.8       | 112        | 2        | Pilings         | 18.3                  | 4.96            | 3       | B           | 0          | 0          | 7-12    |

### Comments

### Forage Fish Spawn Sample Lab Analysis

| Sample Station # | Sample # | Species | # of Eggs | Alive:Dead | Comments |
|------------------|----------|---------|-----------|------------|----------|
| 1                | 1        | PSL     | 3         | --         |          |
| 1                | 2        | N/A     | 0         |            |          |

Processed by: Haley Tomlin (Feb 15, 2018)

Analyzed by: Brian Timmer (Feb 16, 2018)

Version: October 2019

## Forage Fish Spawning Habitat Beach Survey

### Samplers

|                 |                              |
|-----------------|------------------------------|
| Name(s)         | Haley Tomlin & Kidston Short |
| Organization    | MABRRI                       |
| Date (mm/dd/yy) | 11/23/18                     |
| Time (24hr)     | 12:23                        |
| Camera ID       | Fuji #2                      |

Access Database ID: RDN\_QB\_18\_14

| Region | Municipality | Beach | DFO Mngt Area |
|--------|--------------|-------|---------------|
| RDN    | QB           | LQB   | 14-4          |

### Last High Tide (11/23/18)

|                    |
|--------------------|
| Time (24hr): 06:09 |
| Elevation: 4.7m    |

### 2<sup>nd</sup> Effective High Tide

|                 |
|-----------------|
| Time (24hr): -- |
| Elevation: --   |

### Calculating Tidal Elevation

| Station | Elevation Change | Subtract Eye Height | Elevation Difference | Time  | Elevation Relative to Chart Datum | Tidal Elevation (Chart Datum) |
|---------|------------------|---------------------|----------------------|-------|-----------------------------------|-------------------------------|
| 3       | A 1.58m          | -1.0m               | 0.58m                | 12:36 | 3.4m                              | 3.98m                         |
|         | B                |                     |                      |       |                                   |                               |
|         | C                |                     |                      |       |                                   |                               |
|         | D                |                     |                      |       |                                   |                               |
|         | Total            |                     | 0.58m                |       |                                   |                               |

### Current Conditions

|                    |          |
|--------------------|----------|
| Weather Conditions | Overcast |
| Air Temp (°C)      | 8°C      |
| Wind Direction     | ESE      |
| Wind Speed (km/hr) | 0 km/hr  |
| Water Temp (°C)    | 8°C      |

### Episodic Events (determined prior to or after sampling)

Has there been a storm event in the last week? Yes ☒ No

|                    |                               |
|--------------------|-------------------------------|
| Date of Storm      |                               |
| Maximum Wind Speed | Precipitation from Event (mm) |
| Storm Category     |                               |

Evidence of beach wrack harvesting? Yes ☒ No

### Site Attributes

|                      |                |                   |
|----------------------|----------------|-------------------|
| Aspect               | Direction: NNE | Bearing: 15°      |
| Beach Slope          | Flat (<5°)     | Inclined (5°-20°) |
| Max. Fetch Distance* | 66km (N)       | Steep (>20°)      |
| Exposure**           | Very Protected | Protected         |
|                      | Semi-Protected | Semi-Exposed      |
|                      | Exposed        | Very-Exposed      |

\* Determined from chart measurements

\*\* Determined based on Maximum Fetch Distance

### Sediment Sample Collection

| Sample Station # | Time (24hr) | UTM (m) (10U)           | Beach | Backshore | Width (m) | Length (m) | Sample # | Landmark Object   | Landmark Distance (m) | Tidal Elevation | Shading | Sample Type | Surf Smelt | Sand Lance | Photo # |
|------------------|-------------|-------------------------|-------|-----------|-----------|------------|----------|-------------------|-----------------------|-----------------|---------|-------------|------------|------------|---------|
| 3                | 12:23       | 392590 mE<br>5469103 mN | ½     | 5         | 8.5       | 141        | 1        | NW seawall corner | 20                    | 3.98            | 1       | B           | 0          | 0          | 1-6     |

**Comments** Landmark measured from 0m with 0m at the NW end of the beach.

### Forage Fish Spawn Sample Lab Analysis

| Sample Station # | Sample # | Species | # of Eggs | Alive:Dead | Comments |
|------------------|----------|---------|-----------|------------|----------|
| 3                | 1        | PSL     | 9         | --         |          |

Processed by: Haley Tomlin (Nov 23, 2018)

Analyzed by: Chrissy Schellenberg (Nov 26, 2018)

Version: October 2019

## Forage Fish Spawning Habitat Beach Survey

### Location Code (Refer to document)

| Region | Municipality | Beach | DFO Mngt Area |
|--------|--------------|-------|---------------|
| RDN    | GD           | EV    | 17-16         |

### Last High Tide (11/24/18)

|                    |
|--------------------|
| Time (24hr): 07:10 |
| Elevation: 4.6m    |

### 2<sup>nd</sup> Effective High Tide

|                 |
|-----------------|
| Time (24hr): -- |
| Elevation: --   |

### Samplers

|                 |                                |
|-----------------|--------------------------------|
| Name(s)         | Kyle Clifford & Christy Wilson |
| Organization    | Gabriola Shorekeepers          |
| Date (mm/dd/yy) | 11/24/18                       |
| Time (24hr)     | 12:29                          |
| Camera ID       | Kyle's iPhone                  |

### Current Conditions

|                    |     |
|--------------------|-----|
| Air Temp (°C)      | 7°C |
| Wind Direction     | N/A |
| Wind Speed (km/hr) | N/A |
| Water Temp (°C)    | 9°C |

### Sediment Sample Collection

| Sample Station # | Sample # | Time (24hr) | UTM (m)                 | Beach | Backshore | Width (m) | Length (< or > 100m) | Landmark Object*   | Landmark Distance (m) | Shading | Sample Type | Photo # |
|------------------|----------|-------------|-------------------------|-------|-----------|-----------|----------------------|--------------------|-----------------------|---------|-------------|---------|
| 1                | 1        | 12:45       | 443294 mE<br>5442626 mN | 2     | 5         | 5         | > 100                | Wood stair carving | 4.5                   | 1       | B           | 1-6     |

### Comments

(Examples: What does the property surrounding the sample site look like? Is there anything around the site that could negatively impact the survival of forage fish embryos? Have there been any recent storm events or human actions that could have impacted forage fish embryo survival or dispersal?)

No recent storm events.

Processed: Kyle Analyzed: Chrissy (1 PSL)

Version: October 2019

# Forage Fish Spawning Habitat Beach Survey

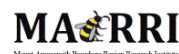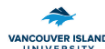

## Samplers

|                 |                     |
|-----------------|---------------------|
| Name(s)         | Chrissy S & Sam P-S |
| Organization    | MABRRI              |
| Date (mm/dd/yy) | 11/24/18            |
| Time (24hr)     | 12:24               |
| Camera ID       | Fuji #2             |

Access Database ID:

| Region | Municipality | Beach | DFO Mngt Area |
|--------|--------------|-------|---------------|
| RDN    | PK           | MB    | 14-1          |

## Last High Tide (11/24/18)

|                    |
|--------------------|
| Time (24hr): 06:58 |
| Elevation: 4.9m    |

## 2nd Effective High Tide

|                 |
|-----------------|
| Time (24hr): -- |
| Elevation: --   |

## Calculating Tidal Elevation

| Station | Elevation Change | Subtract Eye Height | Elevation Difference | Time  | Elevation Relative to Chart Datum | Tidal Elevation (Chart Datum) |
|---------|------------------|---------------------|----------------------|-------|-----------------------------------|-------------------------------|
| 1       | A 1.74m          | -1.0m               | 0.74m                | 12:38 | 3.5m                              | 4.32m                         |
|         | B 1.08m          | -1.0m               | 0.08m                |       |                                   |                               |
|         | C                |                     |                      |       |                                   |                               |
|         | D                |                     |                      |       |                                   |                               |
|         | Total            |                     | 0.82m                |       |                                   |                               |

## Current Conditions

|                    |                      |
|--------------------|----------------------|
| Weather Conditions | Overcast; light wind |
| Air Temp (°C)      | 8°C                  |
| Wind Direction     | N                    |
| Wind Speed (km/hr) | 0 km/hr              |
| Water Temp (°C)    | 8°C                  |

## Episodic Events (determined prior to or after sampling)

Has there been a storm event in the last week? Yes ☒ No

|                    |                               |
|--------------------|-------------------------------|
| Date of Storm      |                               |
| Maximum Wind Speed | Precipitation from Event (mm) |
| Storm Category     |                               |

Evidence of beach wrack harvesting? Yes ☒ No

## Site Attributes

|                      |                |                   |                |                        |               |              |
|----------------------|----------------|-------------------|----------------|------------------------|---------------|--------------|
| Aspect               | Direction: NW  |                   |                |                        | Bearing: 230° |              |
| Beach Slope          | Flat (<5°)     | Inclined (5°-20°) | Steep (>20°)   | Slope of Beach (°): 6° |               |              |
| Max. Fetch Distance* | 16 km (N)      |                   |                |                        |               |              |
| Exposure**           | Very Protected | Protected         | Semi-Protected | Semi-Exposed           | Exposed       | Very-Exposed |

\* Determined from chart measurements

\*\* Determined based on Maximum Fetch Distance

## Sediment Sample Collection

| Sample Station # | Time (24hr) | UTM (m) (10U)           | Beach | Backshore | Width (m) | Length (m) | Sample # | Landmark Object         | Landmark Distance (m) | Tidal Elevation | Shading | Sample Type | Surf Smelt | Sand Lance | Photo # |
|------------------|-------------|-------------------------|-------|-----------|-----------|------------|----------|-------------------------|-----------------------|-----------------|---------|-------------|------------|------------|---------|
| 1                | 12:24       | 404337 mE<br>5464201 mN | 2     | 5         | 7         | 149        | 1        | Boardwalk (11th pillar) | 26                    | 4.32            | 1       | B           | 0          | 0          | 1-6     |

## Comments

## Forage Fish Spawn Sample Lab Analysis

| Sample Station # | Sample # | Species | # of Eggs | Alive:Dead | Comments |
|------------------|----------|---------|-----------|------------|----------|
| 1                | 1        | PSL     | 5         | --         |          |

Processed by: Haley Tomlin (Nov 25, 2018)

Analyzed by: Chrissy Schellenberg (Nov 28, 2018)

Version: October 2019

# Forage Fish Spawning Habitat Beach Survey

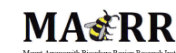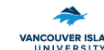

## Location Code (Refer to document)

| Region | Municipality | Beach | DFO Mngt Area |
|--------|--------------|-------|---------------|
| RDN    | GD           | SAB   | 17-10         |

## Last High Tide (11/26/18)

|                    |
|--------------------|
| Time (24hr): 08:40 |
| Elevation: 4.9m    |

## 2nd Effective High Tide (11/25/18)

|                    |
|--------------------|
| Time (24hr): 07:49 |
| Elevation: 4.9m    |

## Samplers

|                 |                       |
|-----------------|-----------------------|
| Name(s)         | Joanna Mackenzie      |
| Organization    | Gabriola Shorekeepers |
| Date (mm/dd/yy) | 11/26/2018            |
| Time (24hr)     | 15:00                 |
| Camera ID       | Joanna's cell phone   |

## Current Conditions

|                    |                     |
|--------------------|---------------------|
| Air Temp (°C)      | 11°C                |
| Wind Direction     | SE                  |
| Wind Speed (km/hr) | 30 km/hr with gusts |
| Water Temp (°C)    | 8°C                 |

## Sediment Sample Collection

| Sample Station # | Sample # | Time (24hr) | UTM (m)                 | Beach | Backshore | Width (m) | Length (< or > 100m) | Landmark Object*                       | Landmark Distance (m) | Shading | Sample Type | Photo # |
|------------------|----------|-------------|-------------------------|-------|-----------|-----------|----------------------|----------------------------------------|-----------------------|---------|-------------|---------|
| 1                | 1        | 15:00       | 440941 mE<br>5448409 mN | 3     | 1         | 3         | 60                   | 2 bare trees at veg. line (S of marsh) | 4                     | 1       | B           | 1-5     |
| 1                | 2        | 15:30       | 440131 mE<br>5448964 mN | 3     | 1         | 4         | 27                   | Greenhouse at NE end of marsh          | 4                     | 1       | 2           | 1-5     |

## Comments

(Examples: What does the property surrounding the sample site look like? Is there anything around the site that could negatively impact the survival of forage fish embryos? Have there been any recent storm events or human actions that could have impacted forage fish embryo survival or dispersal?)

Sample 1: beach changed dramatically since last sampling; much more cobble and boulder gravel. Storm surge and waves pounding beach with logs and debris.

Sample 2: same as above but more large logs and heavy seaweed clumps.

No recent storm events.

Processed: Joanna

Analyzed: Chrissy – Nov 28/18 (Sample 1 = 3PSL; Sample 2 = no eggs)

Version: October 2019

# Forage Fish Spawning Habitat Beach Survey

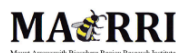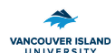

## Location Code (Refer to document)

| Region | Municipality | Beach | DFO Mngt Area |
|--------|--------------|-------|---------------|
| RDN    | GD           | EV    | 17-16         |

## Last High Tide (12/16/18)

|                    |
|--------------------|
| Time (24hr): 12:10 |
| Elevation: 4.4m    |

## 2<sup>nd</sup> Effective High Tide

|                 |
|-----------------|
| Time (24hr): -- |
| Elevation: --   |

## Samplers

|                 |                                |
|-----------------|--------------------------------|
| Name(s)         | Kyle Clifford & Christy Wilson |
| Organization    | Gabriola Shorekeepers          |
| Date (mm/dd/yy) | 12/16/18                       |
| Time (24hr)     | 15:20                          |
| Camera ID       | Kyle's iPhone                  |

## Current Conditions

|                    |         |
|--------------------|---------|
| Air Temp (°C)      | 9°C     |
| Wind Direction     | ESE     |
| Wind Speed (km/hr) | 9 km/hr |
| Water Temp (°C)    | 8°C     |

## Sediment Sample Collection

| Sample Station # | Sample # | Time (24hr) | UTM (m)                 | Beach | Backshore | Width (m) | Length (< or > 100m) | Landmark Object*   | Landmark Distance (m) | Shading | Sample Type | Photo # |
|------------------|----------|-------------|-------------------------|-------|-----------|-----------|----------------------|--------------------|-----------------------|---------|-------------|---------|
| 1                | 1        | 15:20       | 443294 mE<br>5442626 mN | 2     | 5         | 3         | > 100                | Wood stair carving | 4.5                   | 1       | B           | 1 – 6   |
|                  |          |             |                         |       |           |           |                      |                    |                       |         |             |         |
|                  |          |             |                         |       |           |           |                      |                    |                       |         |             |         |

## Comments

(Examples: What does the property surrounding the sample site look like? Is there anything around the site that could negatively impact the survival of forage fish embryos? Have there been any recent storm events or human actions that could have impacted forage fish embryo survival or dispersal?)

No recent storm events.

Processed: Kyle Analyzed: Chrissy (20 PSL)

# Forage Fish Spawning Habitat Beach Survey

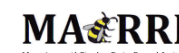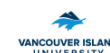

## Location Code (Refer to document)

| Region | Municipality | Beach | DFO Mngt Area |
|--------|--------------|-------|---------------|
| RDN    | GD           | SAB   | 17-10         |

## Last High Tide (12/16/18)

|                    |
|--------------------|
| Time (24hr): 12:09 |
| Elevation: 4.6m    |

## 2<sup>nd</sup> Effective High Tide (12/15/18)

|                    |
|--------------------|
| Time (24hr): 11:32 |
| Elevation: 4.6m    |

## Samplers

|                 |                                |
|-----------------|--------------------------------|
| Name(s)         | Joanna Mackenzie & Dave Hendry |
| Organization    | Gabriola Shorekeepers          |
| Date (mm/dd/yy) | 12/16/18                       |
| Time (24hr)     | 15:00                          |
| Camera ID       | Joanna's cell phone            |

## Current Conditions

|                    |          |
|--------------------|----------|
| Air Temp (°C)      | 10°C     |
| Wind Direction     | SE       |
| Wind Speed (km/hr) | 39 km/hr |
| Water Temp (°C)    | 7°C      |

## Sediment Sample Collection

| Sample Station # | Sample # | Time (24hr) | UTM (m)                 | Beach | Backshore | Width (m) | Length (< or > 100m) | Landmark Object*                       | Landmark Distance (m) | Shading | Sample Type | Photo # |
|------------------|----------|-------------|-------------------------|-------|-----------|-----------|----------------------|----------------------------------------|-----------------------|---------|-------------|---------|
| 1                | 1        | 15:00       | 440248 mE<br>5448575 mN | 3     | 1         | 2         | 46                   | 2 bare trees at veg. line (S of marsh) | 9                     | 1       | B           | 1 – 5   |
|                  |          |             |                         |       |           |           |                      |                                        |                       |         |             |         |
|                  |          |             |                         |       |           |           |                      |                                        |                       |         |             |         |

## Comments

(Examples: What does the property surrounding the sample site look like? Is there anything around the site that could negatively impact the survival of forage fish embryos? Have there been any recent storm events or human actions that could have impacted forage fish embryo survival or dispersal?)

Large waves and tide still quite high with waves pounding beach. Better sand/pea gravel visible than in November sampling. Accessibility limited because of waves.

No recent storm events.

Processed: Joanna Analyzed: Chrissy – Jan 8/19 (19 PSL)



## Forage Fish Spawning Habitat Beach Survey

### Samplers

|                 |                              |
|-----------------|------------------------------|
| Name(s)         | Haley Tomlin & Kidston Short |
| Organization    | MABRRI                       |
| Date (mm/dd/yy) | 01/14/19                     |
| Time (24hr)     | 13:51                        |
| Camera ID       | Fuji #2                      |

Access Database ID: CWVRD\_NC\_19\_01

| Region | Municipality | Beach | DFO Mngt Area |
|--------|--------------|-------|---------------|
| CWVRD  | NC           | MPB   | 18-7          |

### Last High Tide (01/14/19)

|                    |
|--------------------|
| Time (24hr): 10:36 |
| Elevation: 3.7m    |

### 2<sup>nd</sup> Effective High Tide (01/13/19)

|                    |
|--------------------|
| Time (24hr): 10:08 |
| Elevation: 3.8m    |

### Calculating Tidal Elevation

| Station |       | Elevation Change | Subtract Eye Height | Elevation Difference | Time  | Elevation Relative to Chart Datum | Tidal Elevation (Chart Datum) |
|---------|-------|------------------|---------------------|----------------------|-------|-----------------------------------|-------------------------------|
| 1       | A     | 1.38m            | -1.0m               | 0.38m                | 14:01 | 2.9m                              | 3.28m                         |
|         | B     |                  |                     |                      |       |                                   |                               |
|         | C     |                  |                     |                      |       |                                   |                               |
|         | D     |                  |                     |                      |       |                                   |                               |
|         | Total |                  |                     | 0.38m                |       |                                   |                               |

### Current Conditions

|                    |          |
|--------------------|----------|
| Weather Conditions | Blue sky |
| Air Temp (°C)      | 8°C      |
| Wind Direction     | S        |
| Wind Speed (km/hr) | 3 km/hr  |
| Water Temp (°C)    | 6°C      |

### Episodic Events (determined prior to or after sampling)

Has there been a storm event in the last week? Yes ☐ No ☒

|                    |                               |
|--------------------|-------------------------------|
| Date of Storm      |                               |
| Maximum Wind Speed | Precipitation from Event (mm) |
| Storm Category     |                               |

Evidence of beach wrack harvesting? Yes ☐ No ☒

### Site Attributes

|                      |                |                   |                |                         |              |              |
|----------------------|----------------|-------------------|----------------|-------------------------|--------------|--------------|
| Aspect               | Direction: NE  |                   |                |                         | Bearing: 58° |              |
| Beach Slope          | Flat (<5°)     | Inclined (5°-20°) | Steep (>20°)   | Slope of Beach (°): 10° |              |              |
| Max. Fetch Distance* | 7km (SE)       |                   |                |                         |              |              |
| Exposure**           | Very Protected | Protected         | Semi-Protected | Semi-Exposed            | Exposed      | Very-Exposed |

\* Determined from chart measurements

\*\* Determined based on Maximum Fetch Distance

### Sediment Sample Collection

| Sample Station # | Time (24hr) | UTM (m) (10U)           | Beach | Backshore | Width (m) | Length (m) | Sample # | Landmark Object | Landmark Distance (m) | Tidal Elevation | Shading | Sample Type | Surf Smelt | Sand Lance | Photo # |
|------------------|-------------|-------------------------|-------|-----------|-----------|------------|----------|-----------------|-----------------------|-----------------|---------|-------------|------------|------------|---------|
| 1                | 13:51       | 455254 mE<br>5407155 mN | 3     | 5         | 3.5       | 165        | 1        | ." After "C"    | 3.5                   | 3.28            | 2       | B           | 0          | 0          | 1 – 6   |

**Comments** First time embryos found here by MABRRI

### Forage Fish Spawn Sample Lab Analysis

| Sample Station # | Sample # | Species | # of Eggs | Alive:Dead | Comments |
|------------------|----------|---------|-----------|------------|----------|
| 1                | 1        | PSL     | 3         | —          |          |

Processed by: Haley Tomlin (Jan 15/19)

Analyzed by: Chrissy Schellenberg (Jan 19/19)

Version: October 2019

## Forage Fish Spawning Habitat Beach Survey

### Samplers

|                 |                              |
|-----------------|------------------------------|
| Name(s)         | Haley Tomlin & Kidston Short |
| Organization    | MABRRI                       |
| Date (mm/dd/yy) | 01/14/19                     |
| Time (24hr)     | 14:05                        |
| Camera ID       | Fuji #2                      |

Access Database ID: CWVRD\_NC\_19\_02

| Region | Municipality | Beach | DFO Mngt Area |
|--------|--------------|-------|---------------|
| CWVRD  | NC           | MPB   | 18-7          |

### Last High Tide (01/14/19)

|                    |
|--------------------|
| Time (24hr): 10:36 |
| Elevation: 3.7m    |

### 2<sup>nd</sup> Effective High Tide (01/13/19)

|                    |
|--------------------|
| Time (24hr): 10:08 |
| Elevation: 3.8m    |

### Calculating Tidal Elevation

| Station |       | Elevation Change | Subtract Eye Height | Elevation Difference | Time  | Elevation Relative to Chart Datum | Tidal Elevation (Chart Datum) |
|---------|-------|------------------|---------------------|----------------------|-------|-----------------------------------|-------------------------------|
| 1       | A     | 1.35m            | -1.0m               | 0.35m                | 14:10 | 2.8m                              | 3.15m                         |
|         | B     |                  |                     |                      |       |                                   |                               |
|         | C     |                  |                     |                      |       |                                   |                               |
|         | D     |                  |                     |                      |       |                                   |                               |
|         | Total |                  |                     | 0.35m                |       |                                   |                               |

### Current Conditions

|                    |          |
|--------------------|----------|
| Weather Conditions | Blue sky |
| Air Temp (°C)      | 8°C      |
| Wind Direction     | S        |
| Wind Speed (km/hr) | 3 km/hr  |
| Water Temp (°C)    | 6°C      |

### Episodic Events (determined prior to or after sampling)

Has there been a storm event in the last week? Yes ☐ No ☒

|                    |                               |
|--------------------|-------------------------------|
| Date of Storm      |                               |
| Maximum Wind Speed | Precipitation from Event (mm) |
| Storm Category     |                               |

Evidence of beach wrack harvesting? Yes ☐ No ☒

### Site Attributes

|                      |                |                   |                |                         |         |              |
|----------------------|----------------|-------------------|----------------|-------------------------|---------|--------------|
| Aspect               | Direction: NE  |                   |                | Bearing: 58°            |         |              |
| Beach Slope          | Flat (<5°)     | Inclined (5°-20°) | Steep (>20°)   | Slope of Beach (°): 10° |         |              |
| Max. Fetch Distance* | 7km (SE)       |                   |                |                         |         |              |
| Exposure**           | Very Protected | Protected         | Semi-Protected | Semi-Exposed            | Exposed | Very-Exposed |

\* Determined from chart measurements

\*\* Determined based on Maximum Fetch Distance

### Sediment Sample Collection

| Sample Station # | Time (24hr) | UTM (m) (10U)           | Beach | Backshore | Width (m) | Length (m) | Sample # | Landmark Object | Landmark Distance (m) | Tidal Elevation | Shading | Sample Type | Surf Smelt | Sand Lance | Photo # |
|------------------|-------------|-------------------------|-------|-----------|-----------|------------|----------|-----------------|-----------------------|-----------------|---------|-------------|------------|------------|---------|
| 1                | 14:05       | 455263 mE<br>5407208 mN | 2/3   | 5         | 4.5       | 165        | 2        | White gate      | 5.0                   | 3.15            | 2       | B           | 0          | 0          | 1 – 6   |

**Comments** Mix of pea gravel and pebble gravel, but primarily pea gravel.

### Forage Fish Spawn Sample Lab Analysis

| Sample Station # | Sample # | Species | # of Eggs | Alive:Dead | Comments |
|------------------|----------|---------|-----------|------------|----------|
| 1                | 2        | PSL     | 1         | —          |          |

Processed by: Haley Tomlin (Jan 15/19)

Analyzed by: Chrissy Schellenberg (Jan 19/19)

Version: October 2019

## Forage Fish Spawning Habitat Beach Survey

### Samplers

|                 |                         |
|-----------------|-------------------------|
| Name(s)         | Chrissy S & Melanie L-P |
| Organization    | MABRRI                  |
| Date (mm/dd/yy) | 11/10/2019              |
| Time (24hr)     | 07:15                   |
| Camera ID       | Fuji #2                 |

Access Database ID:

| Region | Municipality | Beach | DFO Mngt Area |
|--------|--------------|-------|---------------|
| RDN    | NA           | DB    | 17-13         |

### Last High Tide (11/10/19)

|                    |
|--------------------|
| Time (24hr): 04:38 |
| Elevation: 4.0m    |

### 2<sup>nd</sup> Effective High Tide (11/09/19)

|                    |
|--------------------|
| Time (24hr): 15:26 |
| Elevation: 4.3m    |

### Calculating Tidal Elevation

| Station | Elevation Change | Subtract Eye Height | Elevation Difference | Time  | Elevation Relative to Chart Datum | Tidal Elevation (Chart Datum) |
|---------|------------------|---------------------|----------------------|-------|-----------------------------------|-------------------------------|
| 1       | A                | 1.47m               | -1.0m                | 07:31 | 3.3m                              | 3.77m                         |
|         | B                |                     |                      |       |                                   |                               |
|         | C                |                     |                      |       |                                   |                               |
|         | D                |                     |                      |       |                                   |                               |
|         | Total            |                     | 0.47m                |       |                                   |                               |

### Current Conditions

|                    |                      |
|--------------------|----------------------|
| Weather Conditions | Overcast; light wind |
| Air Temp (°C)      | 10°C                 |
| Wind Direction     | W                    |
| Wind Speed (km/hr) | 8 km/hr              |
| Water Temp (°C)    | 12°C                 |

### Episodic Events (determined prior to or after sampling)

|                                                |     |                               |
|------------------------------------------------|-----|-------------------------------|
| Has there been a storm event in the last week? | Yes | No                            |
| Date of Storm                                  |     |                               |
| Maximum Wind Speed                             |     | Precipitation from Event (mm) |
| Storm Category                                 |     |                               |

Evidence of beach wrack harvesting? Yes No

### Site Attributes

|                      |                |                   |                |                        |              |              |
|----------------------|----------------|-------------------|----------------|------------------------|--------------|--------------|
| Aspect               | Direction: E   |                   |                |                        | Bearing: 98° |              |
| Beach Slope          | Flat (<5°)     | Inclined (5°-20°) | Steep (>20°)   | Slope of Beach (°): 6° |              |              |
| Max. Fetch Distance* | 60km (N)       |                   |                |                        |              |              |
| Exposure**           | Very Protected | Protected         | Semi-Protected | Semi-Exposed           | Exposed      | Very-Exposed |

\* Determined from chart measurements

\*\* Determined based on Maximum Fetch Distance

### Sediment Sample Collection

| Sample Station # | Time (24hr) | UTM (m) (10U)           | Beach | Backshore | Width (m) | Length (m) | Sample # | Landmark Object | Landmark Distance (m) | Tidal Elevation | Shading | Sample Type | Surf Smelt | Sand Lance | Photo # |
|------------------|-------------|-------------------------|-------|-----------|-----------|------------|----------|-----------------|-----------------------|-----------------|---------|-------------|------------|------------|---------|
| 1                | 07:15       | 429364 mE<br>4350718 mN | 2     | 5         | 6         | 300        | 1        | Staircase pole  | 13                    | 3.77            | 1       | B           | 0          | 0          | 1-6     |

**Comments** Beach composition is consistent throughout the whole beach.

### Forage Fish Spawn Sample Lab Analysis

| Sample Station # | Sample # | Species | # of Eggs | Alive:Dead | Comments |
|------------------|----------|---------|-----------|------------|----------|
| 1                | 1        | PSL     | 1         | --         |          |

Processed by: Alanna Vivani (Nov 12, 2019)

Analyzed by: Jayme G. (Nov 12, 2019)

Version: October 2019

## Forage Fish Spawning Habitat Beach Survey

### Samplers

|                 |                             |
|-----------------|-----------------------------|
| Name(s)         | Alanna Vivani & Melanie L-P |
| Organization    | MABRRI                      |
| Date (mm/dd/yy) | 11/13/2019                  |
| Time (24hr)     | 10:51                       |
| Camera ID       | Fuji #2                     |

Access Database ID:

| Region | Municipality | Beach | DFO Mngt Area |
|--------|--------------|-------|---------------|
| RDN    | NA           | DB    | 17-13         |

### Last High Tide (11/13/19)

|                    |
|--------------------|
| Time (24hr): 06:42 |
| Elevation: 4.5m    |

### 2<sup>nd</sup> Effective High Tide

|                 |
|-----------------|
| Time (24hr): -- |
| Elevation: --   |

### Calculating Tidal Elevation

| Station | Elevation Change | Subtract Eye Height | Elevation Difference | Time  | Elevation Relative to Chart Datum | Tidal Elevation (Chart Datum) |
|---------|------------------|---------------------|----------------------|-------|-----------------------------------|-------------------------------|
| 1       | A                | 1.42m               | -1.0m                | 11:18 | 3.3m                              | 4.23m                         |
|         | B                | 1.51m               | -1.0m                |       |                                   |                               |
|         | C                |                     |                      |       |                                   |                               |
|         | D                |                     |                      |       |                                   |                               |
|         | Total            |                     | 0.93m                |       |                                   |                               |

### Current Conditions

|                    |          |
|--------------------|----------|
| Weather Conditions | Overcast |
| Air Temp (°C)      | 10°C     |
| Wind Direction     | ENE      |
| Wind Speed (km/hr) | 3 km/hr  |
| Water Temp (°C)    | 8°C      |

### Episodic Events (determined prior to or after sampling)

|                                                |     |                               |
|------------------------------------------------|-----|-------------------------------|
| Has there been a storm event in the last week? | Yes | No                            |
| Date of Storm                                  |     |                               |
| Maximum Wind Speed                             |     | Precipitation from Event (mm) |
| Storm Category                                 |     |                               |

Evidence of beach wrack harvesting? Yes No

### Site Attributes

|                      |                |                   |                |                        |              |              |
|----------------------|----------------|-------------------|----------------|------------------------|--------------|--------------|
| Aspect               | Direction: E   |                   |                |                        | Bearing: 98° |              |
| Beach Slope          | Flat (<5°)     | Inclined (5°-20°) | Steep (>20°)   | Slope of Beach (°): 6° |              |              |
| Max. Fetch Distance* | 60km (N)       |                   |                |                        |              |              |
| Exposure**           | Very Protected | Protected         | Semi-Protected | Semi-Exposed           | Exposed      | Very-Exposed |

\* Determined from chart measurements

\*\* Determined based on Maximum Fetch Distance

### Sediment Sample Collection

| Sample Station # | Time (24hr) | UTM (m) (10U)           | Beach | Backshore | Width (m) | Length (m) | Sample # | Landmark Object   | Landmark Distance (m) | Tidal Elevation | Shading | Sample Type | Surf Smelt | Sand Lance | Photo # |
|------------------|-------------|-------------------------|-------|-----------|-----------|------------|----------|-------------------|-----------------------|-----------------|---------|-------------|------------|------------|---------|
| 1                | 10:51       | 429388 mE<br>5450798 mN | 2     | 5         | 7.5       | 300        | 1        | Blue sign (wheel) | 13                    | 4.23            | 1       | B           | 0          | 0          | 1-6     |

**Comments** Primarily pea gravel, but pebble gravel scattered throughout.

### Forage Fish Spawn Sample Lab Analysis

| Sample Station # | Sample # | Species | # of Eggs | Alive:Dead | Comments |
|------------------|----------|---------|-----------|------------|----------|
| 1                | 1        | PSL     | 1         | --         |          |

Processed by: Alanna Vivani (Nov 13, 2019)

Analyzed by: Melanie L-P (Nov 14, 2019)

Version: October 2019



# Forage Fish Spawning Habitat Beach Survey

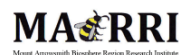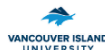

## Samplers

|                 |                              |
|-----------------|------------------------------|
| Name(s)         | Haley Tomlin & Alanna Vivani |
| Organization    | MABRRI                       |
| Date (mm/dd/yy) | 11/19/19                     |
| Time (24hr)     | 05:03                        |
| Camera ID       | Fuji #2                      |

|                     |              |       |               |
|---------------------|--------------|-------|---------------|
| Access Database ID: |              |       |               |
| Region              | Municipality | Beach | DFO Mngt Area |
| RDN                 | NB           | NWB   | 14-1          |

|                                  |                                                      |
|----------------------------------|------------------------------------------------------|
| <b>Last High Tide (11/18/19)</b> | <b>2<sup>nd</sup> Effective High Tide (11/18/19)</b> |
| Time (24hr): 20:20               | Time (24hr): 10:31                                   |
| Elevation: 3.7m                  | Elevation: 4.8m                                      |

## Calculating Tidal Elevation

| Station |       | Elevation Change | Subtract Eye Height | Elevation Difference | Time  | Elevation Relative to Chart Datum | Tidal Elevation (Chart Datum) |
|---------|-------|------------------|---------------------|----------------------|-------|-----------------------------------|-------------------------------|
| 1       | A     | 1.95m            | -1.0m               | 0.95m                | 05:11 | 1.6m                              | 3.78m                         |
|         | B     | 2.23m            | -1.0m               | 1.23m                |       |                                   |                               |
|         | C     |                  |                     |                      |       |                                   |                               |
|         | D     |                  |                     |                      |       |                                   |                               |
|         | Total |                  |                     | 2.18m                |       |                                   |                               |

## Current Conditions

|                    |                           |
|--------------------|---------------------------|
| Weather Conditions | Partly cloudy; light wind |
| Air Temp (°C)      | 8°C                       |
| Wind Direction     | WNW                       |
| Wind Speed (km/hr) | 15 km/hr                  |
| Water Temp (°C)    | 7°C                       |

## Episodic Events (determined prior to or after sampling)

|                                                |     |                               |
|------------------------------------------------|-----|-------------------------------|
| Has there been a storm event in the last week? | Yes | No                            |
| Date of Storm                                  |     |                               |
| Maximum Wind Speed                             |     | Precipitation from Event (mm) |
| Storm Category                                 |     |                               |
| Evidence of beach wrack harvesting?            | Yes | No                            |

## Site Attributes

|                      |                |                   |                |                         |               |              |
|----------------------|----------------|-------------------|----------------|-------------------------|---------------|--------------|
| Aspect               | Direction: NNW |                   |                |                         | Bearing: 330° |              |
| Beach Slope          | Flat (<5°)     | Inclined (5°-20°) | Steep (>20°)   | Slope of Beach (°): 10° |               |              |
| Max. Fetch Distance* | 119km (NNW)    |                   |                |                         |               |              |
| Exposure**           | Very Protected | Protected         | Semi-Protected | Semi-Exposed            | Exposed       | Very-Exposed |

\* Determined from chart measurements

\*\* Determined based on Maximum Fetch Distance

## Sediment Sample Collection

| Sample Station # | Time (24hr) | UTM (m) (10U)           | Beach | Backshore | Width (m) | Length (m) | Sample # | Landmark Object | Landmark Distance (m) | Tidal Elevation | Shading | Sample Type | Surf Smelt | Sand Lance | Photo # |
|------------------|-------------|-------------------------|-------|-----------|-----------|------------|----------|-----------------|-----------------------|-----------------|---------|-------------|------------|------------|---------|
| 1                | 05:03       | 412635 mE<br>5460851 mN | 3     | 1         | 7         | 300        | 1        | Plank on tree   | 13.5                  | 3.78            | 3       | B           | 0          | 0          | 1-2     |

**Comments** Landmark from 20m with 0m at the W end of the beach.

## Forage Fish Spawn Sample Lab Analysis

| Sample Station # | Sample # | Species | # of Eggs | Alive:Dead | Comments |
|------------------|----------|---------|-----------|------------|----------|
| 1                | 1        | PSL     | 33        | —          |          |

Processed by: Alanna Vivani (Nov 19, 2019)

Analyzed by: Chrissy Schellenberg (Nov 19, 2019)

Version: October 2019

# Forage Fish Spawning Habitat Beach Survey

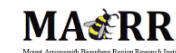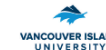

## Location Code (Refer to document)

|        |              |       |               |
|--------|--------------|-------|---------------|
| Region | Municipality | Beach | DFO Mngt Area |
| RDN    | GD           | GS-P  | 17-12         |

## Last High Tide (11/24/19)

|                    |
|--------------------|
| Time (24hr): 03:58 |
| Elevation: 4.1m    |

## 2<sup>nd</sup> Effective High Tide (11/23/19)

|                    |
|--------------------|
| Time (24hr): 14:30 |
| Elevation: 4.7m    |

## Samplers

|                 |                             |
|-----------------|-----------------------------|
| Name(s)         | Betty Kehler & Robert Pizey |
| Organization    | Gabriola Shorekeepers       |
| Date (mm/dd/yy) | 11/24/19                    |
| Time (24hr)     | 10:16                       |
| Camera ID       | Not collected               |

## Current Conditions

|                    |         |
|--------------------|---------|
| Air Temp (°C)      | 11°C    |
| Wind Direction     | NE      |
| Wind Speed (km/hr) | 2 km/hr |
| Water Temp (°C)    | 9°C     |

## Sediment Sample Collection

| Sample Station # | Sample # | Time (24hr) | UTM (m)                 | Beach | Backshore | Width (m) | Length (< or > 100m) | Landmark Object* | Landmark Distance (m) | Shading | Sample Type | Photo # |
|------------------|----------|-------------|-------------------------|-------|-----------|-----------|----------------------|------------------|-----------------------|---------|-------------|---------|
| 1                | 1        | 10:16       | 437467 mE<br>5449410 mN | 1     | 5         | 6         | < 100                | Bench            | 13.5                  | 3       | B           | N/A     |

## Comments

(Examples: What does the property surrounding the sample site look like? Is there anything around the site that could negatively impact the survival of forage fish embryos? Have there been any recent storm events or human actions that could have impacted forage fish embryo survival or dispersal?)

No recent storm events.

Processed: Haley Tomlin (Nov 26/19)

Analyzed: Chrissy Schellenberg (Dec 8/19) (3 PSL)

Version: October 2019

# Forage Fish Spawning Habitat Beach Survey

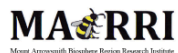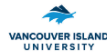

## Location Code (Refer to document)

| Region | Municipality | Beach | DFO Mngt Area |
|--------|--------------|-------|---------------|
| RDN    | GD           | SAB   | 17-10         |

## Last High Tide (11/25/19)

|                    |
|--------------------|
| Time (24hr): 04:55 |
| Elevation: 4.4m    |

## 2<sup>nd</sup> Effective High Tide (11/24/19)

|                    |
|--------------------|
| Time (24hr): 15:02 |
| Elevation: 4.7m    |

## Samplers

|                 |                                |
|-----------------|--------------------------------|
| Name(s)         | Joanna Mackenzie & Dave Hendry |
| Organization    | Gabriola Shorekeepers          |
| Date (mm/dd/yy) | 11/25/19                       |
| Time (24hr)     | 08:45                          |
| Camera ID       | Joanna's phone                 |

## Current Conditions

|                    |           |
|--------------------|-----------|
| Air Temp (°C)      | 6°C       |
| Wind Direction     | NNW       |
| Wind Speed (km/hr) | 2.5 km/hr |
| Water Temp (°C)    | 6°C       |

## Sediment Sample Collection

| Sample Station # | Sample # | Time (24hr) | UTM (m)                 | Beach | Backshore | Width (m) | Length (< or > 100m) | Landmark Object* | Landmark Distance (m) | Shading | Sample Type | Photo # |
|------------------|----------|-------------|-------------------------|-------|-----------|-----------|----------------------|------------------|-----------------------|---------|-------------|---------|
| 1                | 1        | 08:45       | 440248 mE<br>5448575 mN | 3     | 1         | 12        | > 100                | 2 dead trees     | 17.5                  | 1       | B           | 1 – 5   |
|                  |          |             |                         |       |           |           |                      |                  |                       |         |             |         |
|                  |          |             |                         |       |           |           |                      |                  |                       |         |             |         |

## Comments

(Examples: What does the property surrounding the sample site look like? Is there anything around the site that could negatively impact the survival of forage fish embryos? Have there been any recent storm events or human actions that could have impacted forage fish embryo survival or dispersal?)

Log boom broken up on shore. Good pea gravel outside of normal sample area and so included in sample.

No recent storm events.

Processed: Joanna & Dave (Nov 25/19)

Analyzed: Chrissy (Nov 25/19) (33 PSL)

# Forage Fish Spawning Habitat Beach Survey

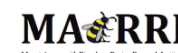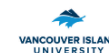

## Location Code (Refer to document)

| Region | Municipality | Beach | DFO Mngt Area |
|--------|--------------|-------|---------------|
| RDN    | GD           | EV    | 17-16         |

## Last High Tide (11/30/19)

|                    |
|--------------------|
| Time (24hr): 09:06 |
| Elevation: 4.8m    |

## 2<sup>nd</sup> Effective High Tide (11/29/19)

|                    |
|--------------------|
| Time (24hr): 08:19 |
| Elevation: 4.8m    |

## Samplers

|                 |                                |
|-----------------|--------------------------------|
| Name(s)         | Kyle Clifford & Christy Wilson |
| Organization    | Gabriola Shorekeepers          |
| Date (mm/dd/yy) | 11/30/19                       |
| Time (24hr)     | 15:20                          |
| Camera ID       | Christy's phone                |

## Current Conditions

|                    |         |
|--------------------|---------|
| Air Temp (°C)      | 5°C     |
| Wind Direction     | E       |
| Wind Speed (km/hr) | 0 km/hr |
| Water Temp (°C)    | 8°C     |

## Sediment Sample Collection

| Sample Station # | Sample # | Time (24hr) | UTM (m)                 | Beach | Backshore | Width (m) | Length (< or > 100m) | Landmark Object*   | Landmark Distance (m) | Shading | Sample Type | Photo # |
|------------------|----------|-------------|-------------------------|-------|-----------|-----------|----------------------|--------------------|-----------------------|---------|-------------|---------|
| 1                | 1        | 15:25       | 443294 mE<br>5442626 mN | 2     | 5         | 5         | > 100                | Wood stair carving | 4.5                   | 1       | B           | 1 – 6   |
|                  |          |             |                         |       |           |           |                      |                    |                       |         |             |         |
|                  |          |             |                         |       |           |           |                      |                    |                       |         |             |         |

## Comments

(Examples: What does the property surrounding the sample site look like? Is there anything around the site that could negatively impact the survival of forage fish embryos? Have there been any recent storm events or human actions that could have impacted forage fish embryo survival or dispersal?)

No recent storm events.

Processed: Alanna Vivani (Dec 2/19)

Analyzed: Brittany Milner (Dec 2/19) (56 PSL)

# Forage Fish Spawning Habitat Beach Survey

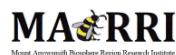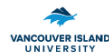

## Location Code (Refer to document)

| Region | Municipality | Beach | DFO Mngt Area |
|--------|--------------|-------|---------------|
| RDN    | FC           | SP1   | 14-4          |

## Last High Tide (12/06/19)

|                    |
|--------------------|
| Time (24hr): 01:30 |
| Elevation: 3.3m    |

## 2<sup>nd</sup> Effective High Tide (12/05/19)

|                    |
|--------------------|
| Time (24hr): 12:40 |
| Elevation: 4.6m    |

## Samplers

|                 |                       |
|-----------------|-----------------------|
| Name(s)         | Carl, Shelley, & Pete |
| Organization    | MVIHES                |
| Date (mm/dd/yy) | 12/06/19              |
| Time (24hr)     | 08:31                 |
| Camera ID       | MVIHES Tablet         |

## Current Conditions

|                    |         |
|--------------------|---------|
| Air Temp (°C)      | 8°C     |
| Wind Direction     | N/A     |
| Wind Speed (km/hr) | 0 km/hr |
| Water Temp (°C)    | 4°C     |

## Sediment Sample Collection

| Sample Station # | Sample # | Time (24hr) | UTM (m)                 | Beach | Backshore | Width (m) | Length (< or > 100m) | Landmark Object* | Landmark Distance (m) | Shading | Sample Type | Photo # |
|------------------|----------|-------------|-------------------------|-------|-----------|-----------|----------------------|------------------|-----------------------|---------|-------------|---------|
| 1                | 1        | 08:31       | 407130 mE<br>5464804 mN | 2     | 5         | 8         | > 100                | NE Fence post    | 28.5                  | 1       | B           | 1 – 6   |
|                  |          |             |                         |       |           |           |                      |                  |                       |         |             |         |
|                  |          |             |                         |       |           |           |                      |                  |                       |         |             |         |

## Comments

(Examples: What does the property surrounding the sample site look like? Is there anything around the site that could negatively impact the survival of forage fish embryos? Have there been any recent storm events or human actions that could have impacted forage fish embryo survival or dispersal?)

No recent storm events.

Processed: Alanna Vivani (Dec 10/19)

Analyzed: Haley Tomlin (Dec 18/19) (1 PSL)

Version: October 2019

# Forage Fish Spawning Habitat Beach Survey

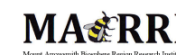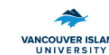

## Location Code (Refer to document)

| Region | Municipality | Beach | DFO Mngt Area |
|--------|--------------|-------|---------------|
| RDN    | FC           | SP4   | 14-4          |

## Last High Tide (12/06/19)

|                    |
|--------------------|
| Time (24hr): 01:30 |
| Elevation: 3.3m    |

## 2<sup>nd</sup> Effective High Tide (12/05/19)

|                    |
|--------------------|
| Time (24hr): 12:40 |
| Elevation: 4.6m    |

## Samplers

|                 |                       |
|-----------------|-----------------------|
| Name(s)         | Carl, Shelley, & Pete |
| Organization    | MVIHES                |
| Date (mm/dd/yy) | 12/06/19              |
| Time (24hr)     | 09:12                 |
| Camera ID       | MVIHES Tablet         |

## Current Conditions

|                    |         |
|--------------------|---------|
| Air Temp (°C)      | 8°C     |
| Wind Direction     | E       |
| Wind Speed (km/hr) | 4 km/hr |
| Water Temp (°C)    | 4°C     |

## Sediment Sample Collection

| Sample Station # | Sample # | Time (24hr) | UTM (m)                 | Beach | Backshore | Width (m) | Length (< or > 100m) | Landmark Object*          | Landmark Distance (m) | Shading | Sample Type | Photo # |
|------------------|----------|-------------|-------------------------|-------|-----------|-----------|----------------------|---------------------------|-----------------------|---------|-------------|---------|
| 4                | 1        | 09:12       | 406643 mE<br>5465141 mN | 3     | 5         | 11        | > 100                | Foreshore surveyor marker | 21.3                  | 1       | B           | 1 – 6   |
|                  |          |             |                         |       |           |           |                      |                           |                       |         |             |         |
|                  |          |             |                         |       |           |           |                      |                           |                       |         |             |         |

## Comments

(Examples: What does the property surrounding the sample site look like? Is there anything around the site that could negatively impact the survival of forage fish embryos? Have there been any recent storm events or human actions that could have impacted forage fish embryo survival or dispersal?)

No recent storm events.

Processed: Haley Tomlin (Dec 10/19)

Analyzed: Alanna Vivani (Dec 17/19) (1 PSL)

Version: October 2019

# Forage Fish Spawning Habitat Beach Survey

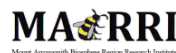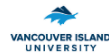

## Location Code (Refer to document)

| Region | Municipality | Beach | DFO Mngt Area |
|--------|--------------|-------|---------------|
| RDN    | GD           | EV    | 17-16         |

## Last High Tide (12/07/19)

|                    |
|--------------------|
| Time (24hr): 02:52 |
| Elevation: 3.5m    |

## 2<sup>nd</sup> Effective High Tide (12/06/19)

|                    |
|--------------------|
| Time (24hr): 13:17 |
| Elevation: 4.4m    |

## Samplers

|                 |                       |
|-----------------|-----------------------|
| Name(s)         | Kyle Clifford         |
| Organization    | Gabriola Shorekeepers |
| Date (mm/dd/yy) | 12/07/19              |
| Time (24hr)     | 09:40                 |
| Camera ID       | Kyle's phone          |

## Current Conditions

|                    |         |
|--------------------|---------|
| Air Temp (°C)      | 9°C     |
| Wind Direction     | E       |
| Wind Speed (km/hr) | 2 km/hr |
| Water Temp (°C)    | 6°C     |

## Sediment Sample Collection

| Sample Station # | Sample # | Time (24hr) | UTM (m)                 | Beach | Backshore | Width (m) | Length (< or > 100m) | Landmark Object*   | Landmark Distance (m) | Shading | Sample Type | Photo # |
|------------------|----------|-------------|-------------------------|-------|-----------|-----------|----------------------|--------------------|-----------------------|---------|-------------|---------|
| 1                | 1        | 09:40       | 443294 mE<br>5442626 mN | 2     | 5         | 5         | > 100                | Wood stair carving | 4.5                   | 1       | B           | 1 – 6   |
|                  |          |             |                         |       |           |           |                      |                    |                       |         |             |         |
|                  |          |             |                         |       |           |           |                      |                    |                       |         |             |         |

## Comments

(Examples: What does the property surrounding the sample site look like? Is there anything around the site that could negatively impact the survival of forage fish embryos? Have there been any recent storm events or human actions that could have impacted forage fish embryo survival or dispersal?)

No recent storm events.

Processed: Kyle Clifford (Dec 7/19)

Analyzed: Haley Tomlin (Dec 18/19) (43 PSL)

Version: October 2019

# Forage Fish Spawning Habitat Beach Survey

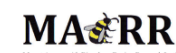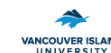

## Location Code (Refer to document)

| Region | Municipality | Beach | DFO Mngt Area |
|--------|--------------|-------|---------------|
| RDN    | NA           | IPB   | 17-18         |

## Last High Tide (12/07/19)

|                    |
|--------------------|
| Time (24hr): 02:52 |
| Elevation: 3.5m    |

## 2<sup>nd</sup> Effective High Tide (12/06/19)

|                    |
|--------------------|
| Time (24hr): 13:17 |
| Elevation: 4.4m    |

## Samplers

|                 |                          |
|-----------------|--------------------------|
| Name(s)         | Chris Depka and students |
| Organization    | Dover Bay Eco-Club       |
| Date (mm/dd/yy) | 12/07/19                 |
| Time (24hr)     | 09:15                    |
| Camera ID       | Chris' phone             |

## Current Conditions

|                    |         |
|--------------------|---------|
| Air Temp (°C)      | 8°C     |
| Wind Direction     | ENE     |
| Wind Speed (km/hr) | 5 km/hr |
| Water Temp (°C)    | 8°C     |

## Sediment Sample Collection

| Sample Station # | Sample # | Time (24hr) | UTM (m)                 | Beach | Backshore | Width (m) | Length (< or > 100m) | Landmark Object* | Landmark Distance (m) | Shading | Sample Type | Photo # |
|------------------|----------|-------------|-------------------------|-------|-----------|-----------|----------------------|------------------|-----------------------|---------|-------------|---------|
| 1                | 1        | 09:15       | 424822 mE<br>5455538 mN | 3     | 2         | 3         | 150                  | Alder Tree       | 14                    | 4       | B           | 1 – 5   |
|                  |          |             |                         |       |           |           |                      |                  |                       |         |             |         |
|                  |          |             |                         |       |           |           |                      |                  |                       |         |             |         |

## Comments

(Examples: What does the property surrounding the sample site look like? Is there anything around the site that could negatively impact the survival of forage fish embryos? Have there been any recent storm events or human actions that could have impacted forage fish embryo survival or dispersal?)

No recent storm events.

Processed: Chris Depka (Dec 7/19)

Analyzed: Brittany Milner (Dec 16/19) (680 PSL)

Version: October 2019

# Forage Fish Spawning Habitat Beach Survey

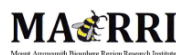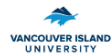

## Location Code (Refer to document)

| Region | Municipality | Beach | DFO Mngt Area |
|--------|--------------|-------|---------------|
| RDN    | GD           | SAB   | 17-10         |

## Last High Tide (12/07/19)

|                    |
|--------------------|
| Time (24hr): 02:57 |
| Elevation: 3.5m    |

## 2<sup>nd</sup> Effective High Tide (12/06/19)

|                    |
|--------------------|
| Time (24hr): 13:06 |
| Elevation: 4.5m    |

## Samplers

|                 |                       |
|-----------------|-----------------------|
| Name(s)         | Joanna Mackenzie      |
| Organization    | Gabriola Shorekeepers |
| Date (mm/dd/yy) | 12/07/19              |
| Time (24hr)     | 08:30                 |
| Camera ID       | Joanna's phone        |

## Current Conditions

|                    |         |
|--------------------|---------|
| Air Temp (°C)      | 9°C     |
| Wind Direction     | ESE     |
| Wind Speed (km/hr) | 3 km/hr |
| Water Temp (°C)    | 6°C     |

## Sediment Sample Collection

| Sample Station # | Sample # | Time (24hr) | UTM (m)                 | Beach | Backshore | Width (m) | Length (< or > 100m) | Landmark Object* | Landmark Distance (m) | Shading | Sample Type | Photo # |
|------------------|----------|-------------|-------------------------|-------|-----------|-----------|----------------------|------------------|-----------------------|---------|-------------|---------|
| 1                | 1        | 08:30       | 440248 mE<br>5448575 mN | 3     | 1         | 8         | 300                  | 2 dead trees     | 16                    | 1       | B           | 1 – 5   |
|                  |          |             |                         |       |           |           |                      |                  |                       |         |             |         |
|                  |          |             |                         |       |           |           |                      |                  |                       |         |             |         |

## Comments

(Examples: What does the property surrounding the sample site look like? Is there anything around the site that could negatively impact the survival of forage fish embryos? Have there been any recent storm events or human actions that could have impacted forage fish embryo survival or dispersal?)

Overcast day. Large pebbles all over sampling area. Seaweed was in thick lines.

No recent storm events.

Processed: Joanna Mackenzie (Dec 7/19)

Analyzed: Haley Tomlin (Dec 18/19) (28 PSL)

Version: October 2019

# Forage Fish Spawning Habitat Beach Survey

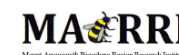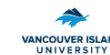

## Samplers

|                 |                              |
|-----------------|------------------------------|
| Name(s)         | Haley Tomlin & Alanna Vivani |
| Organization    | MABRRI                       |
| Date (mm/dd/yy) | 12/09/19                     |
| Time (24hr)     | 18:10                        |
| Camera ID       | Fuji #2                      |

## Access Database ID:

| Region | Municipality | Beach | DFO Mngt Area |
|--------|--------------|-------|---------------|
| RDN    | NA           | DB    | 17-13         |

## Last High Tide (12/09/19)

|                    |
|--------------------|
| Time (24hr): 14:45 |
| Elevation: 4.3m    |

## 2<sup>nd</sup> Effective High Tide (12/08/19)

|                    |
|--------------------|
| Time (24hr): 14:17 |
| Elevation: 4.3m    |

## Calculating Tidal Elevation

| Station | Elevation Change | Subtract Eye Height | Elevation Difference | Time  | Elevation Relative to Chart Datum | Tidal Elevation (Chart Datum) |
|---------|------------------|---------------------|----------------------|-------|-----------------------------------|-------------------------------|
| 1       | A 1.90m          | -1.0m               | 0.90m                | 18:17 | 2.95m                             | 4.6m                          |
|         | B 1.75m          | -1.0m               | 0.75m                |       |                                   |                               |
|         | C                |                     |                      |       |                                   |                               |
|         | D                |                     |                      |       |                                   |                               |
| Total   |                  |                     | 1.65m                |       |                                   |                               |

## Current Conditions

|                    |          |
|--------------------|----------|
| Weather Conditions | Overcast |
| Air Temp (°C)      | 5°C      |
| Wind Direction     | SE       |
| Wind Speed (km/hr) | 0 km/hr  |
| Water Temp (°C)    | 6°C      |

## Episodic Events (determined prior to or after sampling)

Has there been a storm event in the last week? Yes ☒ No

|                    |                               |
|--------------------|-------------------------------|
| Date of Storm      |                               |
| Maximum Wind Speed | Precipitation from Event (mm) |
| Storm Category     |                               |

Evidence of beach wrack harvesting? Yes ☒ No

## Site Attributes

|                      |                |                   |                |                        |
|----------------------|----------------|-------------------|----------------|------------------------|
| Aspect               | Direction: ESE |                   | Bearing: 110°  |                        |
| Beach Slope          | Flat (<5°)     | Inclined (5°-20°) | Steep (>20°)   | Slope of Beach (°): 8° |
| Max. Fetch Distance* | 60km (NE)      |                   |                |                        |
| Exposure**           | Very Protected | Protected         | Semi-Protected | Semi-Exposed           |

\* Determined from chart measurements

\*\* Determined based on Maximum Fetch Distance

## Sediment Sample Collection

| Sample Station # | Time (24hr) | UTM (m) (10U)           | Beach | Backshore | Width (m) | Length (m) | Sample # | Landmark Object | Landmark Distance (m) | Tidal Elevation | Shading | Sample Type | Surf Smelt | Sand Lance | Photo # |
|------------------|-------------|-------------------------|-------|-----------|-----------|------------|----------|-----------------|-----------------------|-----------------|---------|-------------|------------|------------|---------|
| 1                | 18:10       | 429380 mE<br>5450788 mN | 3     | 5         | 8         | 300        | 1        | Sign            | 8.5                   | 4.6             | 1       | B           | 0          | 0          | 1 – 6   |
|                  |             |                         |       |           |           |            |          |                 |                       |                 |         |             |            |            |         |

**Comments** Pockets of sand and sand base under the pebble gravel. Landmark from 11m with 0m at E end of beach.

## Forage Fish Spawn Sample Lab Analysis

| Sample Station # | Sample # | Species | # of Eggs | Alive:Dead | Comments |
|------------------|----------|---------|-----------|------------|----------|
| 1                | 1        | PSL     | 4         | --         |          |
|                  |          |         |           |            |          |

Processed by: Haley Tomlin (Dec 10, 2019)

Analyzed by: Alanna Vivani (Dec 19, 2019)

Version: October 2019

## Forage Fish Spawning Habitat Beach Survey

### Samplers

|                 |                              |
|-----------------|------------------------------|
| Name(s)         | Haley Tomlin & Alanna Vivani |
| Organization    | MABRRI                       |
| Date (mm/dd/yy) | 12/09/19                     |
| Time (24hr)     | 16:45                        |
| Camera ID       | Fuji #2                      |

|                     |              |       |               |
|---------------------|--------------|-------|---------------|
| Access Database ID: |              |       |               |
| Region              | Municipality | Beach | DFO Mngt Area |
| CWVRD               | NC           | MPB   | 18-7          |

|                                  |                                                      |
|----------------------------------|------------------------------------------------------|
| <b>Last High Tide (12/09/19)</b> | <b>2<sup>nd</sup> Effective High Tide (12/08/19)</b> |
| Time (24hr): 14:05               | Time (24hr): 13:40                                   |
| Elevation: 3.5m                  | Elevation: 3.6m                                      |

### Calculating Tidal Elevation

| Station |   | Elevation Change | Subtract Eye Height | Elevation Difference | Time  | Elevation Relative to Chart Datum | Tidal Elevation (Chart Datum) |
|---------|---|------------------|---------------------|----------------------|-------|-----------------------------------|-------------------------------|
| 1       | A | 1.59m            | -1.0m               | 0.59m                | 16:54 | 2.75m                             | 3.34m                         |
|         | B |                  |                     |                      |       |                                   |                               |
|         | C |                  |                     |                      |       |                                   |                               |
|         | D |                  |                     |                      |       |                                   |                               |
| Total   |   |                  |                     | 0.59m                |       |                                   |                               |

### Current Conditions

|                    |               |
|--------------------|---------------|
| Weather Conditions | Partly cloudy |
| Air Temp (°C)      | 6°C           |
| Wind Direction     | ENE           |
| Wind Speed (km/hr) | 0 km/hr       |
| Water Temp (°C)    | 7°C           |

### Episodic Events (determined prior to or after sampling)

|                                                |     |                               |
|------------------------------------------------|-----|-------------------------------|
| Has there been a storm event in the last week? | Yes | No                            |
| Date of Storm                                  |     |                               |
| Maximum Wind Speed                             |     | Precipitation from Event (mm) |
| Storm Category                                 |     |                               |
| Evidence of beach wrack harvesting?            | Yes | No                            |

### Site Attributes

|                      |                |                   |                |                         |              |              |
|----------------------|----------------|-------------------|----------------|-------------------------|--------------|--------------|
| Aspect               | Direction: E   |                   |                |                         | Bearing: 98° |              |
| Beach Slope          | Flat (<5°)     | Inclined (5°-20°) | Steep (>20°)   | Slope of Beach (°): 10° |              |              |
| Max. Fetch Distance* | 7km (SE)       |                   |                |                         |              |              |
| Exposure**           | Very Protected | Protected         | Semi-Protected | Semi-Exposed            | Exposed      | Very-Exposed |

\* Determined from chart measurements  
\*\* Determined based on Maximum Fetch Distance

### Sediment Sample Collection

| Sample Station # | Time (24hr) | UTM (m) (10U)           | Beach | Backshore | Width (m) | Length (m) | Sample # | Landmark Object | Landmark Distance (m) | Tidal Elevation | Shading | Sample Type | Surf Smelt | Sand Lance | Photo # |
|------------------|-------------|-------------------------|-------|-----------|-----------|------------|----------|-----------------|-----------------------|-----------------|---------|-------------|------------|------------|---------|
| 1                | 16:45       | 455249 mE<br>5407157 mN | 2     | 5         | 5         | 300        | 1        | "R" on wall     | 3.5                   | 3.34            | 1       | B           | 0          | 0          | 1-6     |

**Comments** Landmark from 20m with 0m at the W end of the beach.

### Forage Fish Spawn Sample Lab Analysis

| Sample Station # | Sample # | Species | # of Eggs | Alive:Dead | Comments |
|------------------|----------|---------|-----------|------------|----------|
| 1                | 1        | PSL     | 1         | --         |          |

Processed by: Alanna Vivani (Dec 10, 2019)

Analyzed by: Haley Tomlin (Dec 13, 2019)

Version: October 2019

## Forage Fish Spawning Habitat Beach Survey

### Samplers

|                 |                              |
|-----------------|------------------------------|
| Name(s)         | Haley Tomlin & Alanna Vivani |
| Organization    | MABRRI                       |
| Date (mm/dd/yy) | 12/09/19                     |
| Time (24hr)     | 18:45                        |
| Camera ID       | Fuji #2                      |

|                     |              |       |               |
|---------------------|--------------|-------|---------------|
| Access Database ID: |              |       |               |
| Region              | Municipality | Beach | DFO Mngt Area |
| RDN                 | NA           | MS    | 17-21         |

|                                  |                                                      |
|----------------------------------|------------------------------------------------------|
| <b>Last High Tide (12/09/19)</b> | <b>2<sup>nd</sup> Effective High Tide (12/08/19)</b> |
| Time (24hr): 14:45               | Time (24hr): 14:17                                   |
| Elevation: 4.3m                  | Elevation: 4.3m                                      |

### Calculating Tidal Elevation

| Station |   | Elevation Change | Subtract Eye Height | Elevation Difference | Time  | Elevation Relative to Chart Datum | Tidal Elevation (Chart Datum) |
|---------|---|------------------|---------------------|----------------------|-------|-----------------------------------|-------------------------------|
| 1       | A | 1.84m            | -1.0m               | 0.84m                | 18:50 | 2.3m                              | 3.1m                          |
|         | B | 1.96m            | -1.0m               | 0.96m                |       |                                   |                               |
|         | C |                  |                     |                      |       |                                   |                               |
|         | D |                  |                     |                      |       |                                   |                               |
| Total   |   |                  |                     | 1.8m                 |       |                                   |                               |

### Current Conditions

|                    |               |
|--------------------|---------------|
| Weather Conditions | Partly cloudy |
| Air Temp (°C)      | 5°C           |
| Wind Direction     | NE            |
| Wind Speed (km/hr) | 0 km/hr       |
| Water Temp (°C)    | 6°C           |

### Episodic Events (determined prior to or after sampling)

|                                                |     |                               |
|------------------------------------------------|-----|-------------------------------|
| Has there been a storm event in the last week? | Yes | No                            |
| Date of Storm                                  |     |                               |
| Maximum Wind Speed                             |     | Precipitation from Event (mm) |
| Storm Category                                 |     |                               |
| Evidence of beach wrack harvesting?            | Yes | No                            |

### Site Attributes

|                      |                |                   |                |                        |              |              |
|----------------------|----------------|-------------------|----------------|------------------------|--------------|--------------|
| Aspect               | Direction: E   |                   |                |                        | Bearing: 78° |              |
| Beach Slope          | Flat (<5°)     | Inclined (5°-20°) | Steep (>20°)   | Slope of Beach (°): 9° |              |              |
| Max. Fetch Distance* | 37km (NE)      |                   |                |                        |              |              |
| Exposure**           | Very Protected | Protected         | Semi-Protected | Semi-Exposed           | Exposed      | Very-Exposed |

\* Determined from chart measurements  
\*\* Determined based on Maximum Fetch Distance

### Sediment Sample Collection

| Sample Station # | Time (24hr) | UTM (m) (10U)           | Beach | Backshore | Width (m) | Length (m) | Sample # | Landmark Object | Landmark Distance (m) | Tidal Elevation | Shading | Sample Type | Surf Smelt | Sand Lance | Photo # |
|------------------|-------------|-------------------------|-------|-----------|-----------|------------|----------|-----------------|-----------------------|-----------------|---------|-------------|------------|------------|---------|
| 1                | 18:45       | 429726 mE<br>5453566 mN | 3     | 5         | 7.5       | 53         | 1        | Stairs          | 6                     | 3.1             | 2       | B           | 0          | 0          | 1-6     |

**Comments** Primarily pebble gravel, mix of pea gravel and sand patches. Landmark from 30m with 30m at S end of beach.

### Forage Fish Spawn Sample Lab Analysis

| Sample Station # | Sample # | Species | # of Eggs | Alive:Dead | Comments |
|------------------|----------|---------|-----------|------------|----------|
| 1                | 1        | PSL     | 12        | --         |          |

Processed by: Alanna Vivani (Dec 10, 2019)

Analyzed by: Haley Tomlin (Dec 19, 2019)

Version: October 2019



## Forage Fish Spawning Habitat Beach Survey

### Samplers

|                 |                              |
|-----------------|------------------------------|
| Name(s)         | Haley Tomlin & Alanna Vivani |
| Organization    | MABRRI                       |
| Date (mm/dd/yy) | 12/09/19                     |
| Time (24hr)     | 19:10                        |
| Camera ID       | Fuji #2                      |

Access Database ID:

| Region | Municipality | Beach | DFO Mngt Area |
|--------|--------------|-------|---------------|
| RDN    | LA           | SEB   | 17-18         |

Last High Tide (12/09/19)

Time (24hr): 14:45

Elevation: 4.3m

2<sup>nd</sup> Effective High Tide (12/08/19)

Time (24hr): 14:17

Elevation: 4.3m

### Calculating Tidal Elevation

| Station | Elevation Change | Subtract Eye Height | Elevation Difference | Time  | Elevation Relative to Chart Datum | Tidal Elevation (Chart Datum) |
|---------|------------------|---------------------|----------------------|-------|-----------------------------------|-------------------------------|
| 1       | A                | 2.07m               | -1.0m                | 19:15 | 2.3m                              | 4.31m                         |
|         | B                | 1.94m               | -1.0m                |       |                                   |                               |
|         | C                |                     |                      |       |                                   |                               |
|         | D                |                     |                      |       |                                   |                               |
| Total   |                  |                     | 2.01m                |       |                                   |                               |

### Current Conditions

|                    |               |
|--------------------|---------------|
| Weather Conditions | Partly cloudy |
| Air Temp (°C)      | 5°C           |
| Wind Direction     | SSE           |
| Wind Speed (km/hr) | 5 km/hr       |
| Water Temp (°C)    | 6°C           |

### Episodic Events (determined prior to or after sampling)

Has there been a storm event in the last week? Yes ☐ No ☒

|                    |                               |
|--------------------|-------------------------------|
| Date of Storm      |                               |
| Maximum Wind Speed | Precipitation from Event (mm) |
| Storm Category     |                               |

Evidence of beach wrack harvesting? Yes ☐ No ☒

### Site Attributes

|                      |                |                   |                |                       |              |              |
|----------------------|----------------|-------------------|----------------|-----------------------|--------------|--------------|
| Aspect               | Direction: NE  |                   |                |                       | Bearing: 51° |              |
| Beach Slope          | Flat (<5°)     | Inclined (5°-20°) | Steep (>20°)   | Slope of Beach (°):9° |              |              |
| Max. Fetch Distance* | 59km (E)       |                   |                |                       |              |              |
| Exposure**           | Very Protected | Protected         | Semi-Protected | Semi-Exposed          | Exposed      | Very-Exposed |

\* Determined from chart measurements

\*\* Determined based on Maximum Fetch Distance

### Sediment Sample Collection

| Sample Station # | Time (24hr) | UTM (m) (10U)           | Beach | Backshore | Width (m) | Length (m) | Sample # | Landmark Object | Landmark Distance (m) | Tidal Elevation | Shading | Sample Type | Surf Smelt | Sand Lance | Photo # |
|------------------|-------------|-------------------------|-------|-----------|-----------|------------|----------|-----------------|-----------------------|-----------------|---------|-------------|------------|------------|---------|
| 1                | 19:10       | 421315 mE<br>5456451 mN | 1     | 5         | 10        | 200        | 1        | Iron gate       | 12.5                  | 4.31            | 1       | B           | 0          | 0          | 1-6     |

**Comments** Landmark from 17m with 0m at East end.

### Forage Fish Spawn Sample Lab Analysis

| Sample Station # | Sample # | Species | # of Eggs | Alive:Dead | Comments |
|------------------|----------|---------|-----------|------------|----------|
| 1                | 1        | PSL     | 1,406     | --         |          |

Processed by: Alanna Vivani (Dec 10, 2019)

Analyzed by: Haley Tomlin & Brittany Milner (Dec 20, 2019)

Version: October 2019

## Forage Fish Spawning Habitat Beach Survey

### Samplers

|                 |                              |
|-----------------|------------------------------|
| Name(s)         | Haley Tomlin & Alanna Vivani |
| Organization    | MABRRI                       |
| Date (mm/dd/yy) | 12/09/19                     |
| Time (24hr)     | 20:35                        |
| Camera ID       | Fuji #2                      |

Access Database ID:

| Region | Municipality | Beach | DFO Mngt Area |
|--------|--------------|-------|---------------|
| RDN    | SH           | SUB   | 14-5          |

Last High Tide (12/09/19)

Time (24hr): 15:00

Elevation: 4.5m

2<sup>nd</sup> Effective High Tide (12/08/19)

Time (24hr): 14:32

Elevation: 4.5m

### Calculating Tidal Elevation

| Station | Elevation Change | Subtract Eye Height | Elevation Difference | Time | Elevation Relative to Chart Datum | Tidal Elevation (Chart Datum) |
|---------|------------------|---------------------|----------------------|------|-----------------------------------|-------------------------------|
| 1       | A                | Not collected       | Tide too far         |      |                                   |                               |
|         | B                |                     |                      |      |                                   |                               |
|         | C                |                     |                      |      |                                   |                               |
|         | D                |                     |                      |      |                                   |                               |
| Total   |                  |                     | N/A                  |      |                                   |                               |

### Current Conditions

|                    |          |
|--------------------|----------|
| Weather Conditions | Overcast |
| Air Temp (°C)      | 5°C      |
| Wind Direction     | WSW      |
| Wind Speed (km/hr) | 2 km/hr  |
| Water Temp (°C)    | 7°C      |

### Episodic Events (determined prior to or after sampling)

Has there been a storm event in the last week? Yes ☐ No ☒

|                    |                               |
|--------------------|-------------------------------|
| Date of Storm      |                               |
| Maximum Wind Speed | Precipitation from Event (mm) |
| Storm Category     |                               |

Evidence of beach wrack harvesting? Yes ☐ No ☒

### Site Attributes

|                      |                |                   |                |                        |              |              |
|----------------------|----------------|-------------------|----------------|------------------------|--------------|--------------|
| Aspect               | Direction: NE  |                   |                |                        | Bearing: 56° |              |
| Beach Slope          | Flat (<5°)     | Inclined (5°-20°) | Steep (>20°)   | Slope of Beach (°): 7° |              |              |
| Max. Fetch Distance* | 102 km (ESE)   |                   |                |                        |              |              |
| Exposure**           | Very Protected | Protected         | Semi-Protected | Semi-Exposed           | Exposed      | Very-Exposed |

\* Determined from chart measurements

\*\* Determined based on Maximum Fetch Distance

### Sediment Sample Collection

| Sample Station # | Time (24hr) | UTM (m) (10U)           | Beach | Backshore | Width (m) | Length (m) | Sample # | Landmark Object | Landmark Distance (m) | Tidal Elevation | Shading | Sample Type | Surf Smelt | Sand Lance | Photo # |
|------------------|-------------|-------------------------|-------|-----------|-----------|------------|----------|-----------------|-----------------------|-----------------|---------|-------------|------------|------------|---------|
| 1                | 20:35       | 381479 mE<br>5474058 mN | ½     | 5         | 10        | 300        | 1        | Fence post      | 15                    | n/a             | 1       | B           | 0          | 0          | 1-6     |

**Comments** Sand above, pea & pebble gravel below the transect. Landmark from 22m with 0m from N end of beach.

### Forage Fish Spawn Sample Lab Analysis

| Sample Station # | Sample # | Species | # of Eggs | Alive:Dead | Comments |
|------------------|----------|---------|-----------|------------|----------|
| 1                | 1        | PSL     | 217       | --         |          |

Processed by: Haley Tomlin (Dec 10, 2019)

Analyzed by: Alanna Vivani (Dec 18, 2019)

Version: October 2019

## Forage Fish Spawning Habitat Beach Survey

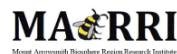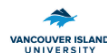

### Location Code (Refer to document)

| Region | Municipality | Beach | DFO Mngt Area |
|--------|--------------|-------|---------------|
| RDN    | NA           | IPB   | 17-18         |

### Last High Tide (12/17/19)

|                    |
|--------------------|
| Time (24hr): 10:11 |
| Elevation: 4.9m    |

### 2<sup>nd</sup> Effective High Tide (12/16/19)

|                    |
|--------------------|
| Time (24hr): 09:26 |
| Elevation: 4.9m    |

### Samplers

|                 |                           |
|-----------------|---------------------------|
| Name(s)         | Chris Depka and his class |
| Organization    | Gabriola Shorekeepers     |
| Date (mm/dd/yy) | 12/17/19                  |
| Time (24hr)     | 15:45                     |
| Camera ID       | Tian's phone              |

### Current Conditions

|                    |          |
|--------------------|----------|
| Air Temp (°C)      | 9°C      |
| Wind Direction     | ESE      |
| Wind Speed (km/hr) | 31 km/hr |
| Water Temp (°C)    | 9°C      |

### Sediment Sample Collection

| Sample Station # | Sample # | Time (24hr) | UTM (m)                | Beach | Backshore | Width (m) | Length (< or > 100m) | Landmark Object* | Landmark Distance (m) | Shading | Sample Type | Photo # |
|------------------|----------|-------------|------------------------|-------|-----------|-----------|----------------------|------------------|-----------------------|---------|-------------|---------|
| 1                | 1        | 15:45       | 424822 mE<br>545538 mN | 1     | 2         | 11        | 100                  | Alder tree       | 18                    | 4       | B           | 1 – 6   |
|                  |          |             |                        |       |           |           |                      |                  |                       |         |             |         |
|                  |          |             |                        |       |           |           |                      |                  |                       |         |             |         |

### Comments

(Examples: What does the property surrounding the sample site look like? Is there anything around the site that could negatively impact the survival of forage fish embryos? Have there been any recent storm events or human actions that could have impacted forage fish embryo survival or dispersal?)

No recent storm events.

Processed: Haley Tomlin (Dec 20/19)

Analyzed: Alanna Vivani (Dec 20/19) (228 PSL)

Version: October 2019

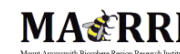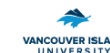

## Forage Fish Spawning Habitat Beach Survey

### Samplers

|                 |                              |
|-----------------|------------------------------|
| Name(s)         | Haley Tomlin & Alanna Vivani |
| Organization    | MABRRI                       |
| Date (mm/dd/yy) | 01/07/20                     |
| Time (24hr)     | 16:55                        |
| Camera ID       | Fuji #2                      |

### Access Database ID:

| Region | Municipality | Beach | DFO Mngt Area |
|--------|--------------|-------|---------------|
| RDN    | NA           | DB    | 17-13         |

### Last High Tide 01/07/20

|                    |
|--------------------|
| Time (24hr): 13:46 |
| Elevation: 4.3m    |

### 2<sup>nd</sup> Effective High Tide 01/06/20

|                    |
|--------------------|
| Time (24hr): 13:08 |
| Elevation: 4.3m    |

### Calculating Tidal Elevation

| Station |   | Elevation Change | Subtract Eye Height | Elevation Difference | Time  | Elevation Relative to Chart Datum | Tidal Elevation (Chart Datum) |
|---------|---|------------------|---------------------|----------------------|-------|-----------------------------------|-------------------------------|
| 1       | A | 1.98m            | -1.0m               | 0.98m                | 16:58 | 3.2m                              | 4.18m                         |
|         | B |                  |                     |                      |       |                                   |                               |
|         | C |                  |                     |                      |       |                                   |                               |
|         | D |                  |                     |                      |       |                                   |                               |
| Total   |   |                  |                     | 0.98m                |       |                                   |                               |

### Current Conditions

|                    |          |
|--------------------|----------|
| Weather Conditions | Overcast |
| Air Temp (°C)      | 9        |
| Wind Direction     | SE       |
| Wind Speed (km/hr) | 14       |
| Water Temp (°C)    | 7        |

### Episodic Events (determined prior to or after sampling)

|                                                |     |                               |
|------------------------------------------------|-----|-------------------------------|
| Has there been a storm event in the last week? | Yes | No                            |
| Date of Storm                                  |     |                               |
| Maximum Wind Speed                             |     | Precipitation from Event (mm) |
| Storm Category                                 |     |                               |

Evidence of beach wrack harvesting? Yes No

### Site Attributes

|                      |                |                   |                |                        |               |              |
|----------------------|----------------|-------------------|----------------|------------------------|---------------|--------------|
| Aspect               | Direction: ESE |                   |                |                        | Bearing: 102° |              |
| Beach Slope          | Flat (<5°)     | Inclined (5°-20°) | Steep (>20°)   | Slope of Beach (°): 7° |               |              |
| Max. Fetch Distance* | 60 km (NE)     |                   |                |                        |               |              |
| Exposure**           | Very Protected | Protected         | Semi-Protected | Semi-Exposed           | Exposed       | Very-Exposed |

\* Determined from chart measurements

\*\* Determined based on Maximum Fetch Distance

### Sediment Sample Collection

| Sample Station # | Time (24hr) | UTM (m)                 | Beach | Backshore | Width (m) | Length (m) | Sample # | Landmark Object | Landmark Distance (m) | Tidal Elevation | Shading | Sample Type | Surf Smelt | Sand Lance | Photo # |
|------------------|-------------|-------------------------|-------|-----------|-----------|------------|----------|-----------------|-----------------------|-----------------|---------|-------------|------------|------------|---------|
| 1                | 16:55       | 429380 mE<br>5450793 mN | 1     | 5         | 10.5      | 300        | 1        | Blue sign       | 8.5                   | 4.18            | 1       | B           | 0          | 0          | 1 – 6   |
|                  |             |                         |       |           |           |            |          |                 |                       |                 |         |             |            |            |         |
|                  |             |                         |       |           |           |            |          |                 |                       |                 |         |             |            |            |         |

Comments Landmark from 14m with 0m at the East end of the beach

### Forage Fish Spawn Sample Lab Analysis

| Sample Station # | Sample # | Species | # of Eggs | Alive:Dead | Comments              |
|------------------|----------|---------|-----------|------------|-----------------------|
| 1                | 1        | PSL     | 1         | --         | Confirmed Feb 3, 2020 |

Processed by: Alanna Vivani (January 8, 2020)

Analyzed by: Brittany Milner (January 13, 2020)

Version: October 2019

## Forage Fish Spawning Habitat Beach Survey

### Samplers

|                 |                              |
|-----------------|------------------------------|
| Name(s)         | Haley Tomlin & Alanna Vivani |
| Organization    | MABRRI                       |
| Date (mm/dd/yy) | 01/07/20                     |
| Time (24hr)     | 15:45                        |
| Camera ID       | Fuji #2                      |

Access Database ID:

| Region | Municipality | Beach | DFO Mngt Area |
|--------|--------------|-------|---------------|
| CWVRD  | NC           | MB    | 18-7          |

### Last High Tide 01/07/20

|                    |
|--------------------|
| Time (24hr): 13:08 |
| Elevation: 3.6m    |

### 2<sup>nd</sup> Effective High Tide 01/06/20

|                    |
|--------------------|
| Time (24hr): 12:25 |
| Elevation: 3.6m    |

### Calculating Tidal Elevation

| Station | Elevation Change | Subtract Eye Height | Elevation Difference | Time  | Elevation Relative to Chart Datum | Tidal Elevation (Chart Datum) |
|---------|------------------|---------------------|----------------------|-------|-----------------------------------|-------------------------------|
| 1       | A                | 1.4m                | -1.0m                | 15:52 | 2.85m                             | 3.25m                         |
|         | B                |                     |                      |       |                                   |                               |
|         | C                |                     |                      |       |                                   |                               |
|         | D                |                     |                      |       |                                   |                               |
|         | Total            |                     | 0.4m                 |       |                                   |                               |

### Current Conditions

|                    |         |
|--------------------|---------|
| Weather Conditions | Raining |
| Air Temp (°C)      | 8       |
| Wind Direction     | S       |
| Wind Speed (km/hr) | 11      |
| Water Temp (°C)    | 7       |

### Episodic Events (determined prior to or after sampling)

Has there been a storm event in the last week? Yes ☒ No

|                    |                               |
|--------------------|-------------------------------|
| Date of Storm      |                               |
| Maximum Wind Speed | Precipitation from Event (mm) |
| Storm Category     |                               |

Evidence of beach wrack harvesting? Yes ☒ No

### Site Attributes

|                      |                                                                                                                                                                                                                          |              |
|----------------------|--------------------------------------------------------------------------------------------------------------------------------------------------------------------------------------------------------------------------|--------------|
| Aspect               | Direction: E                                                                                                                                                                                                             | Bearing: 90° |
| Beach Slope          | Flat (<5°) <input checked="" type="radio"/> Inclined (5°-20°) <input type="radio"/> Steep (>20°) <input type="radio"/> Slope of Beach (°): 11°                                                                           |              |
| Max. Fetch Distance* | 7 km (SE)                                                                                                                                                                                                                |              |
| Exposure**           | Very Protected <input type="radio"/> Protected <input checked="" type="radio"/> Semi-Protected <input type="radio"/> Semi-Exposed <input type="radio"/> Exposed <input type="radio"/> Very-Exposed <input type="radio"/> |              |

\* Determined from chart measurements

\*\* Determined based on Maximum Fetch Distance

### Sediment Sample Collection

| Sample Station # | Time (24hr) | UTM (m)                 | Beach | Backshore | Width (m) | Length (m) | Sample # | Landmark Object | Landmark Distance (m) | Tidal Elevation | Shading | Sample Type | Surf Smelt | Sand Lance | Photo # |
|------------------|-------------|-------------------------|-------|-----------|-----------|------------|----------|-----------------|-----------------------|-----------------|---------|-------------|------------|------------|---------|
| 1                | 15:45       | 455251 mE<br>5407153 mN | 2/3   | 5         | 4.5       | 300        | 1        | "R" on the wall | 3                     | 3.25            | 1       | B           | 0          | 0          | 1-6     |

### Comments

### Forage Fish Spawn Sample Lab Analysis

| Sample Station # | Sample # | Species | # of Eggs | Alive:Dead | Comments              |
|------------------|----------|---------|-----------|------------|-----------------------|
| 1                | 1        | PSL     | 9         | --         | Confirmed Feb 3, 2020 |

Processed by: Alanna Vivani (January 8, 2020)

Analyzed by: Brittany Milner (January 8, 2020)

Version: October 2019

## Forage Fish Spawning Habitat Beach Survey

### Location Code (Refer to document)

| Region | Municipality | Beach | DFO Mngt Area |
|--------|--------------|-------|---------------|
| RDN    | QB           | JUR   | 14-4          |

### Last High Tide 01/17/20

|                    |
|--------------------|
| Time (24hr): 10:50 |
| Elevation: 5.0m    |

### 2<sup>nd</sup> Effective High Tide 01/16/20

|                    |
|--------------------|
| Time (24hr): 10:11 |
| Elevation: 5.1m    |

### Samplers

|                 |                              |
|-----------------|------------------------------|
| Name(s)         | John, Keith, & Sylvia        |
| Organization    | Qualicum Beach StreamKeepers |
| Date (mm/dd/yy) | 01/17/20                     |
| Time (24hr)     | 17:00                        |
| Camera ID       | Sylvia's Phone               |

### Current Conditions

|                    |    |
|--------------------|----|
| Air Temp (°C)      | 2  |
| Wind Direction     | SE |
| Wind Speed (km/hr) | 11 |
| Water Temp (°C)    | 5  |

### Sediment Sample Collection

| Sample Station # | Sample # | Time (24hr) | UTM (m)                 | Beach | Backshore | Width (m) | Length (< or > 100m) | Landmark Object* | Landmark Distance (m) | Shading | Sample Type | Photo # |
|------------------|----------|-------------|-------------------------|-------|-----------|-----------|----------------------|------------------|-----------------------|---------|-------------|---------|
| 2                | 1        | 17:00       | 396003 mE<br>5468430 mN | 3     | 5         | 7         | <                    | Cedar trees      | 8                     | 1       | B           | 1-6     |

### Comments

(Examples: What does the property surrounding the sample site look like? Is there anything around the site that could negatively impact the survival of forage fish embryos? Have there been any recent storm events or human actions that could have impacted forage fish embryo survival or dispersal?)

Landmark from 8m with 0m at the East end of the tape.

Recent storm event: January 10 – 13, 2020; max wind = 59.5 km/hr; 39.62mm of precipitation; strong wind warning

Processed: Haley Tomlin (January 21, 2020)

Analyzed: Alanna Vivani (January 28, 2020) – 1 PSL (confirmed February 3, 2020)

\*Note: Your landmark distance may change each time you are at the beach depending on weather and tide conditions. Use the initial document with all the beaches as your reference for landmark.

Version: October 2019

## Forage Fish Spawning Habitat Beach Survey

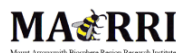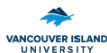

### Samplers

|                 |                                |
|-----------------|--------------------------------|
| Name(s)         | Haley Tomlin & Brittany Milner |
| Organization    | MABRRI                         |
| Date (mm/dd/yy) | 01/20/20                       |
| Time (24hr)     | 18:10                          |
| Camera ID       | Brittany's phone               |

Access Database ID:

| Region | Municipality | Beach | DFO Mngt Area |
|--------|--------------|-------|---------------|
| RDN    | LA           | SEB   | 17-18         |

### Last High Tide 01/20/20

|                    |
|--------------------|
| Time (24hr): 12:58 |
| Elevation: 4.4m    |

### 2<sup>nd</sup> Effective High Tide 01/19/20

|                    |
|--------------------|
| Time (24hr): 12:12 |
| Elevation: 4.6m    |

### Calculating Tidal Elevation

| Station | Elevation Change | Subtract Eye Height | Elevation Difference | Time | Elevation Relative to Chart Datum | Tidal Elevation (Chart Datum) |
|---------|------------------|---------------------|----------------------|------|-----------------------------------|-------------------------------|
| 1       | A                |                     |                      |      |                                   | Not collected – Too dark      |
|         | B                |                     |                      |      |                                   |                               |
|         | C                |                     |                      |      |                                   |                               |
|         | D                |                     |                      |      |                                   |                               |
|         | Total            |                     |                      |      |                                   |                               |

### Current Conditions

|                    |                      |
|--------------------|----------------------|
| Weather Conditions | Overcast and raining |
| Air Temp (°C)      | 7                    |
| Wind Direction     | SE                   |
| Wind Speed (km/hr) | 14                   |
| Water Temp (°C)    | 6                    |

### Episodic Events (determined prior to or after sampling)

|                                                |     |                               |
|------------------------------------------------|-----|-------------------------------|
| Has there been a storm event in the last week? | Yes | No                            |
| Date of Storm                                  |     |                               |
| Maximum Wind Speed                             |     | Precipitation from Event (mm) |
| Storm Category                                 |     |                               |

Evidence of beach wrack harvesting? Yes No

### Site Attributes

|                      |                |                   |                |                                   |
|----------------------|----------------|-------------------|----------------|-----------------------------------|
| Aspect               | Direction: ENE |                   | Bearing: 62°   |                                   |
| Beach Slope          | Flat (<5°)     | Inclined (5°-20°) | Steep (>20°)   | Slope of Beach (°): 7°            |
| Max. Fetch Distance* | 59 km (E)      |                   |                |                                   |
| Exposure**           | Very Protected | Protected         | Semi-Protected | Semi-Exposed Exposed Very-Exposed |

\* Determined from chart measurements

\*\* Determined based on Maximum Fetch Distance

### Sediment Sample Collection

| Sample Station # | Time (24hr) | UTM (m)                 | Beach | Backshore | Width (m) | Length (m) | Sample # | Landmark Object | Landmark Distance (m) | Tidal Elevation | Shading | Sample Type | Surf Smelt | Sand Lance | Photo # |
|------------------|-------------|-------------------------|-------|-----------|-----------|------------|----------|-----------------|-----------------------|-----------------|---------|-------------|------------|------------|---------|
| 1                | 18:10       | 421311 mE<br>5456456 mN | 1     | 5         | 10.5      | 215        | 1        | Iron gate       | 12                    | –               | 1       | B           | 0          | 0          | 1 – 2   |

### Comments

### Forage Fish Spawn Sample Lab Analysis

| Sample Station # | Sample # | Species | # of Eggs | Alive:Dead | Comments |
|------------------|----------|---------|-----------|------------|----------|
| 1                | 1        | PSL     | 5         | –          |          |

Processed by: Brittany Milner (January 21, 2020)

Analyzed by: Brittany Milner (February 1, 2020)

Version: October 2019

## Forage Fish Spawning Habitat Beach Survey

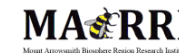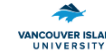

### Location Code (Refer to document)

| Region | Municipality | Beach | DFO Mngt Area |
|--------|--------------|-------|---------------|
| RDN    | GD           | RB    | 17-10         |

### Last High Tide 01/23/20

|                   |
|-------------------|
| Time (24hr): 5:56 |
| Elevation: 4.7m   |

### 2<sup>nd</sup> Effective High Tide

|                  |
|------------------|
| Time (24hr): --- |
| Elevation: ---   |

### Samplers

|                 |                       |
|-----------------|-----------------------|
| Name(s)         | Ruby Chapman          |
| Organization    | Gabriola ShoreKeepers |
| Date (mm/dd/yy) | 01/23/20              |
| Time (24hr)     | 11:55                 |
| Camera ID       | Ruby's Phone          |

### Current Conditions

|                    |     |
|--------------------|-----|
| Air Temp (°C)      | 10  |
| Wind Direction     | SSE |
| Wind Speed (km/hr) | 14  |
| Water Temp (°C)    | 10  |

### Sediment Sample Collection

| Sample Station # | Sample # | Time (24hr) | UTM (m)                 | Beach | Backshore | Width (m) | Length (< or > 100m) | Landmark Object* | Landmark Distance (m) | Shading | Sample Type | Photo # |
|------------------|----------|-------------|-------------------------|-------|-----------|-----------|----------------------|------------------|-----------------------|---------|-------------|---------|
| 1                | 1        | 11:55       | 448504 mE<br>5445351 mN | 2     | 3         | 5         | <                    | Old dead tree    | 9                     | 1       | B           | 1 – 6   |

### Comments

(Examples: What does the property surrounding the sample site look like? Is there anything around the site that could negatively impact the survival of forage fish embryos? Have there been any recent storm events or human actions that could have impacted forage fish embryo survival or dispersal?)

No recent storm event.

Processed: Ruby Chapman (January 23, 2020)

Analyzed: Brittany Milner (January 29, 2020) – 1 PSL (confirmed Feb 3, 2020)

\*Note: Your landmark distance may change each time you are at the beach depending on weather and tide conditions. Use the initial document with all the beaches as your reference for landmark.

Version: October 2019

# Forage Fish Spawning Habitat Beach Survey

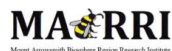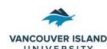

## Location Code (Refer to document)

| Region | Municipality | Beach | DFO Mngt Area |
|--------|--------------|-------|---------------|
| RDN    | NA           | IPB   | 17-18         |

## Last High Tide (01/26/20)

|                    |
|--------------------|
| Time (24hr): 07:35 |
| Elevation: 4.7m    |

## 2<sup>nd</sup> Effective High Tide (01/25/20)

|                    |
|--------------------|
| Time (24hr): 07:04 |
| Elevation: 4.7m    |

## Samplers

|                 |                           |
|-----------------|---------------------------|
| Name(s)         | Chris Depka and his class |
| Organization    | Gabriola Shorekeepers     |
| Date (mm/dd/yy) | 01/26/20                  |
| Time (24hr)     | 12:30                     |
| Camera ID       |                           |

## Current Conditions

|                    |          |
|--------------------|----------|
| Air Temp (°C)      | 10°C     |
| Wind Direction     | SE       |
| Wind Speed (km/hr) | 15 km/hr |
| Water Temp (°C)    | 7°C      |

## Sediment Sample Collection

| Sample Station # | Sample # | Time (24hr) | UTM (m)                 | Beach | Backshore | Width (m) | Length (< or > 100m) | Landmark Object* | Landmark Distance (m) | Shading | Sample Type | Photo # |
|------------------|----------|-------------|-------------------------|-------|-----------|-----------|----------------------|------------------|-----------------------|---------|-------------|---------|
| 1                | 1        | 15:45       | 424822 mE<br>5455538 mN | 1     | 2         | 3         | 150                  | Alder tree       | 20                    | 4       | B           |         |
|                  |          |             |                         |       |           |           |                      |                  |                       |         |             |         |
|                  |          |             |                         |       |           |           |                      |                  |                       |         |             |         |

## Comments

(Examples: What does the property surrounding the sample site look like? Is there anything around the site that could negatively impact the survival of forage fish embryos? Have there been any recent storm events or human actions that could have impacted forage fish embryo survival or dispersal?)

No recent storm events.

Processed: Chris Depka (Jan 26/20)

Analyzed: Brittany Milner (Jan 29/20) (1 PSL)
